# Supplementary material for: Smokers’ Engagement Behavior on Facebook: Verbalizing and Visual Expressing the Smoking Cessation Process
Source: Int J Environ Res Public Health. 2022 Aug 12;19(16):9983. doi: 10.3390/ijerph19169983 (PMC9408543; doi:10.3390/ijerph19169983)

## File S1: Examples of the investigated stimuli

Social media contents which were all image-based, adopted the motivational interviewing principle, and supported smoking cessation.

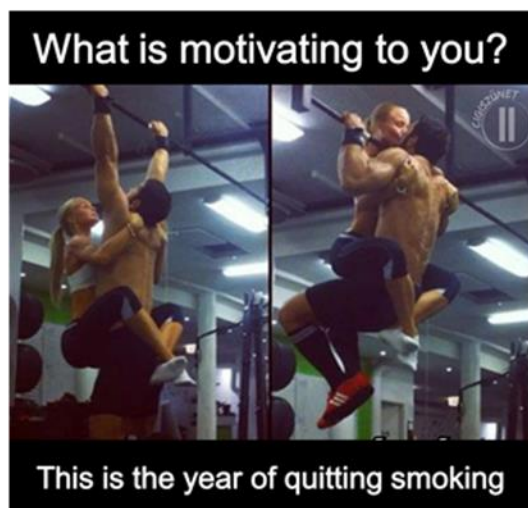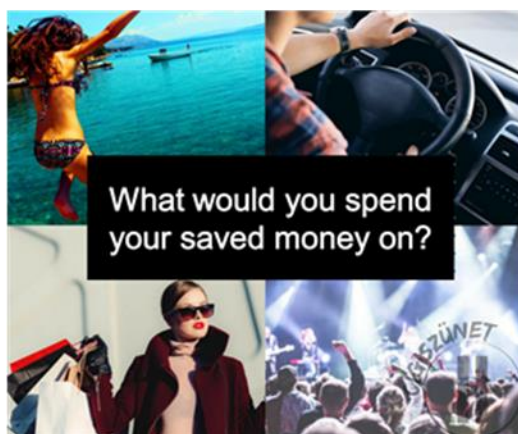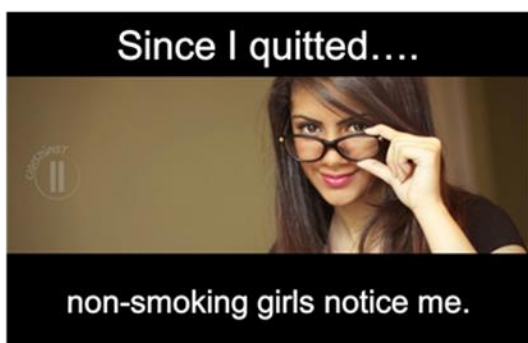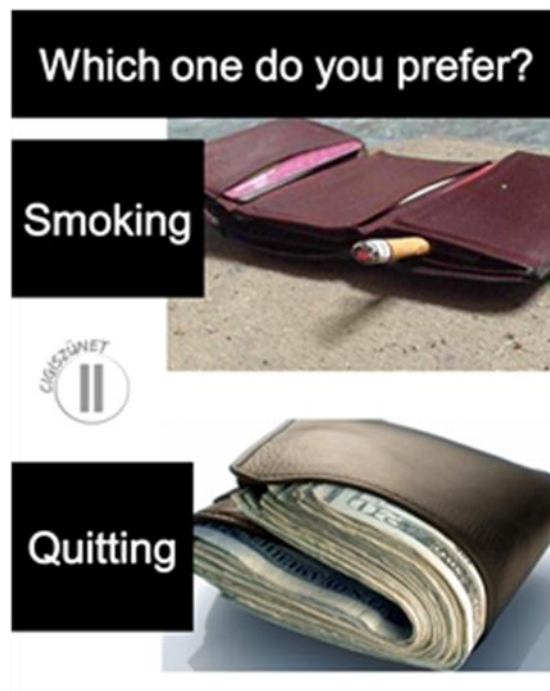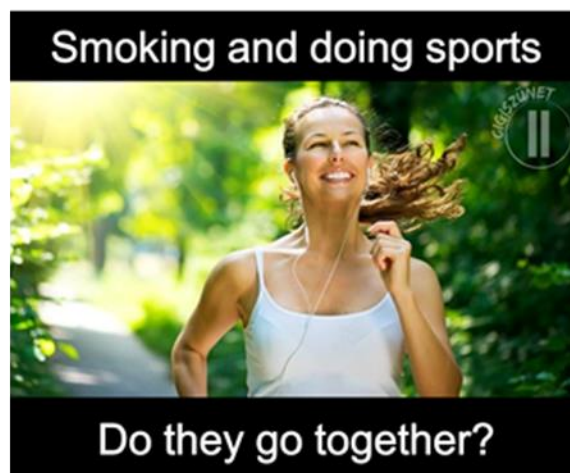

Behind every former smoker  
there is...

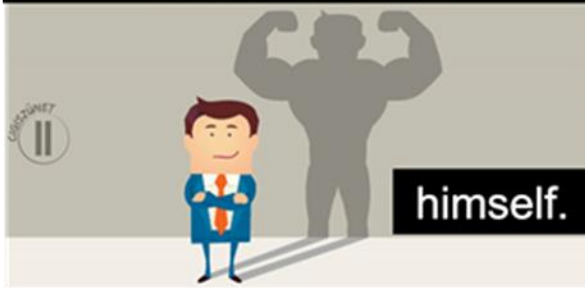

Quitting seems impossible

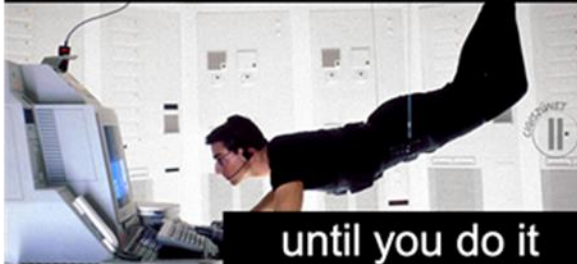

I want to quit. One day  
I smoke only one pack.

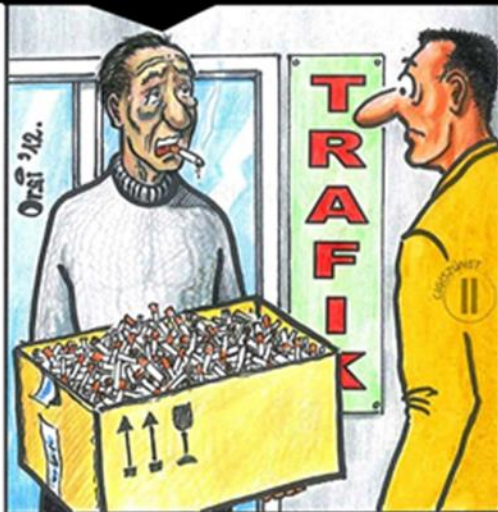

Since Chuck Norris stopped smoking

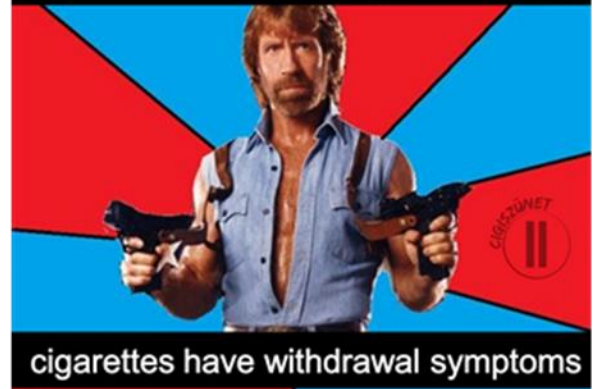

Since I stopped smoking...

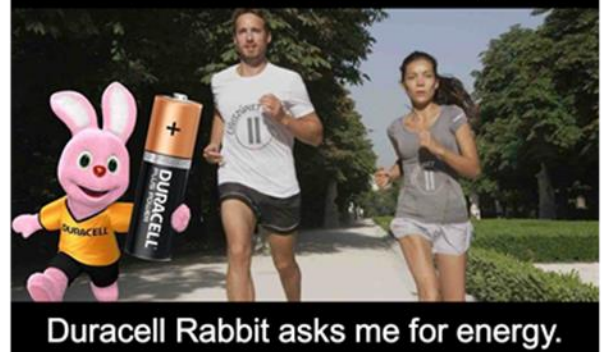

At last...

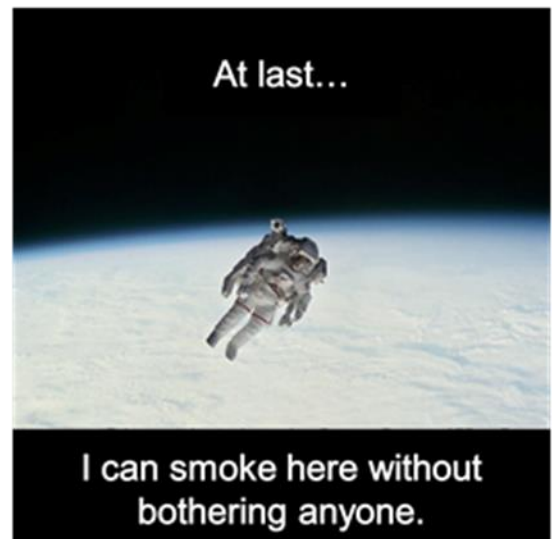

Supplement: Supplementary file 1 [file ijerph-19-09983-s001.zip › File S1.pdf]
