# Supplementary material for: Smokers’ Engagement Behavior on Facebook: Verbalizing and Visual Expressing the Smoking Cessation Process
Source: Int J Environ Res Public Health. 2022 Aug 12;19(16):9983. doi: 10.3390/ijerph19169983 (PMC9408543; doi:10.3390/ijerph19169983)
Supplement: Supplementary file 1 [file ijerph-19-09983-s001.zip › File S2.pdf]

## **File S2: Categories of comment analysis**

### **Processes of change**

These phrases are specific actions (processes) which are taken by smokers to stop tobacco use.

#### **Experiential Processes**

Smokers' phrases that express cognitive, affective, and evaluative processes are used primarily in the early stage of tobacco use cessation.

#### **Consciousness Raising**

Smokers' phrases that increase awareness via any information about tobacco use cessation.

- "I look for information related to my smoking behavior."
- "I think about information from articles and books on how to quit smoking."
- "I read about people who have successfully stopped smoking."
- "I recall information people have personally given me about the benefits of quitting."

#### **Dramatic Relief**

Smokers' phrases that express emotional arousal about tobacco cessation.

- "Dramatic portrayals about smoking affect me emotionally."
- "I react emotionally to warnings about the consequences of smoking."
- "Remembering reports about illnesses caused by smoking upsets me."
- "Warnings about hazards of smoking move me emotionally."

#### **Social Liberation**

Smokers' phrases that express the recognition that society supports the cessation of tobacco use.

- "I encounter social situations that are designed to help reduce smoking."
- "I find that society is changing in ways that make it easier for me to quit smoking."
- "I notice that people with the same problem I have are asserting their rights."
- "I read about people who have successfully stopped smoking."

#### **Environmental Reevaluation**

Smokers' phrases that express the recognition that tobacco use has a negative effect on others, and the cessation of tobacco use has a positive effect on others.

- “I consider the view that smoking can be harmful to the environment.”
- “I feel more empathy for non-smokers who are disturbed by cigarette smoke.”
- “I am angry when I see a smoker who has no regard for secondhand smoke.”
- “I think I can serve as a negative role model as a smoker for my young sister.”

### Self-reevaluation

Smokers’ phrases that express the development of a new self-image without tobacco use.

- “I consider that my family and friends would be better off without my smoking behavior.”
- “My tendency to give in to smoking makes me feel disappointed in myself.”
- “I reassess the fact that being content with myself includes quitting.”
- “I get upset when I think about giving in to smoking.”

### Behavioral Processes

Smokers’ phrases that express action-oriented processes used primarily in a later stage of tobacco use cessation.

### Self-liberation

Smokers’ phrases that express the belief that smokers have the ability to stop tobacco use and are committed to acting on that belief.

- “I tell myself that if I try hard enough, I can stop smoking.”
- “I make commitments against giving in to smoking.”
- “I use willpower to keep from engaging in my smoking behavior.”
- “I tell myself I can choose to quit or not.”

### Reinforcement management

Smokers’ phrases that express the rewards for cessation behavior and reduce the rewards for smoking behavior.

- “I do something nice for myself in return for not giving in to smoking.”
- “I counter the temptation to punish myself with covert reinforcements.”
- “I reward myself for small quitting steps.”
- “Other people in my daily life try to make me feel good about smoking cessation.”

### Helping Relationship

Smokers’ phrases that express to find people (e.g., family members, friends) who support tobacco use cessation.

- “I have someone who listens when I need to talk about smoking cessation.”
- “I can be open with at least one person about experiences related to quitting.”
- “I have someone on whom I can count when I am craving for cigarettes.”

- “I have someone who understands my smoking behavior.”

### Stimulus Control

Smokers’ phrases that express the use of reminders and signs that encourage cessation behavior and avoid an environment that doesn't.

- “I remove things from my home that remind me of my smoking behavior.”
- “I leave places where other people are encouraging smoking.”
- “I put things around my home or workplace that remind me not to engage in my smoking behavior.”
- “I relate less often to people who contribute to smoking.”

### Counter Conditioning

Smokers’ phrases that express the learning of cessation behaviors that can replace for smoking behaviors.

- “I engage in some physical activity when I am tempted to engage in my smoking behavior.”
- “When I feel the craving for cigarettes, I try to relax.”
- “I find that other activities are a good substitute for smoking.”
- “When I feel my smoking behavior coming on, I think about or do something else.”

## Motivational language, motivational utterances

These phrases used by smokers who express motivation/demotivation for tobacco use cessation or action/inaction towards tobacco use cessation (change talk / sustain talk).

### Change talk

Smoker’s phrases that favor movement toward tobacco use cessation.

### Preparatory change talk (“DARN”)

Any smoker’s comment that expresses motivation for tobacco use cessation or using tobacco: Desire (e.g., want, wish, like), Ability (e.g., can, could, able), Reason (e.g., specific causes of action), and Need (e.g., need, have to, got to, must).

- Desire
  - “I want to quit smoking.”
  - “I wish I could quit smoking.”
  - “I like to stop smoking.”
- Ability
  - “I can quit smoking.”
  - “I could quit smoking.”
  - “I am able to stop smoking.”

- Reasons
  - "I have many reasons to quit."
  - "My health is my motivation to quit smoking."
- Need
  - "I need to quit smoking."
  - "I have to stop smoking."
  - "I must stop smoking."

### Mobilizing change talk ("CAT")

Any smoker's comment that expresses action for tobacco use cessation or using tobacco: Commitment (e.g., will, do, going to), Activation (e.g., ready, willing, considering), and Taking steps (e.g., an action already taken).

- Commitment
  - "I will quit smoking."
  - "I quit smoking."
  - "I am going to stop smoking."
- Activation
  - "I am ready to quit smoking."
  - "I am willing to stop smoking."
  - "I am considering quitting smoking."
- Taking steps
  - "I bought a nicotine patch."
  - "I started to reduce smoking."

### Sustain talk

Smoker's phrases that favor remaining a tobacco user rather than moving toward tobacco use cessation.

- "I don't want to quit smoking."
- "I wish I could smoke again."
- "I can't quit smoking."
- "I couldn't quit smoking during pregnancy."
- "I won't be able to stop smoking."
- "I've got no reason to quit."
- "I have many reasons to smoke cigarettes again."
- "I need to smoke."
- "I don't have to quit smoking."
- "I mustn't quit."
- "I will smoke again."
- "I am not ready to quit smoking."
- "I'm considering smoking again."
- "I bought a pack of cigarette."
- "I smoked my friend's cigarette."
