# Supplementary material for: Smokers’ Engagement Behavior on Facebook: Verbalizing and Visual Expressing the Smoking Cessation Process
Source: Int J Environ Res Public Health. 2022 Aug 12;19(16):9983. doi: 10.3390/ijerph19169983 (PMC9408543; doi:10.3390/ijerph19169983)
Supplement: Supplementary file 1 [file ijerph-19-09983-s001.zip › File S3.xlsx]

## Sheet: Exclusion of FB posts
Dates of FB posts	Exclusion criteria
20170307/1	1
20170307/2	1
20170308/1	1
20170308/2	5
20170310	4
20170313	4
20170314	1
20170315/1	3
20170315/2	3
20170316	4
20170318	3
20170319	5
20170320	4
20170321	2
20170322	4
20170323	4
20170324	5
20170325	4
20170326	4
20170327	4
20170328	2
20170329	4
20170330	4
20170331	1
20170401/1	3
20170401/2	4
20170402	3
20170403/1	4
20170403/2	4
20170404	1
20170406	3
20170407	4
20170408/1	5
20170408/2	5
20170409/1	3
20170409/2	4
20170410	3
20170411/1	3
20170411/2	3
20170412/1	3
20170412/2	1
20170413	5
20170414	2
20170415	4
20170416/1	3
20170416/2	1
20170417/1	4
20170417/2	2
20170418	5
20170419	4
20170421	3
20170422/1	2
20170422/2	4
20170423	4
20170424	5
20170425	3
20170427/1	4
20170427/2	1
20170428	3
20170429	4
20170430	3
20170501/1	2
20170501/2	3
20170502	1
20170504/1	3
20170504/2	1
20170505	4
20170506	2
20170507	1
20170508	3
20170509	3
20170510	3
20170513/1	3
20170513/2	4
20170519	3
20170526	3
20170527	1
20170530	3
20170531/1	3
20170531/2	3
20170603	4
20170604	3
20170607	3
20170609	3
20170611	3
20170614	3
20170616	3
20170618	4
20170621	3
20170624	4
20170625	3
20170628	5
20170630	3
20170702	4
20170705	3
20170707	3
20170709	2
20170712	3
20170713	4
20170714	2
20170715	3
20170716	3
20170719	3
20170721	1
20170722	2
20170723	3
20170724	3
20170725	3
20170726	4
20170727	3
20170730	4
20170731	4
20170801	3
20170802	4
20170803	4
20170804	3
20170806	3
20170807	4
20170809	3
20170811	3
20170813	3
20170814	4
20170815	4
20170816	4
20170818	3
20170821/1	1
20170821/2	3
20170823	4
20170825/1	1
20170825/2	1
20170826/1	3
20170826/2	4
20170827/1	3
20170827/2	3
20170828	3
20170829	5
20170830	3
20170831/1	1
20170831/2	1
20170901	4
20170903	1
20170905	3
20170906	4
20170907	5
20170909	1
20170911	3
20170913	1
20170915	3
20170917	3
20170919	3
20170921	3
20170923	1
20170924	1
20170925	1
20170926	1
20170927	3
20170928	3
20170929	4
20170930	1
20171001	3
20171002	2
20171003	3
20171005	3
20171007	3
20171009	3
20171010	4
20171011	3
20171013	3
20171015	3
20171017	3
20171018	3
20171019	3
20171021	3
20171023	1
20171025	3
20171027	3
20171029	3
20171031	3
20171101	3
20171102	3
20171103	3
20171105	4
20171107	3
20171110	3
20171111	3
20171112	3
20171113	3
20171114	3
20171115	3
20171116/1	1
20171116/2	3
20171116/3	3
20171117	3
20171118	3
20171119/1	3
20171119/2	3
20171120	3
20171121	3
20171122	3
20171123	3
20171124	5
20171125/1	3
20171125/2	3
20171126/1	4
20171126/2	3
20171127	3
20171128	3
20171129	3
20171130	3
20171201	3
20171202/1	3
20171202/2	3
20171203/1	3
20171203/2	3
20171204	3
20171205/1	3
20171205/2	3
20171206/1	3
20171206/2	5
20171206/3	3
20171208	3
20171209/1	4
20171209/2	3
20171209/3	2
20171210/1	3
20171210/2	3
20171211/1	3
20171211/2	3
20171212/1	3
20171212/2	3
20171213/1	4
20171213/2	3
20171214/1	3
20171214/2	3
20171215/1	3
20171215/2	3
20171216/1	2
20171216/2	3
20171216/3	3
20171217/1	1
20171217/2	3
20171217/3	3
20171218/1	1
20171218/2	3
20171219/1	1
20171219/2	3
20171220/1	1
20171220/2	2
20171220/3	3
20171221/1	1
20171221/2	3
20171222/1	1
20171222/2	3
20171223/1	1
20171223/2	3
20171224/1	3
20171224/2	1
20171225/1	3
20171225/2	3
20171226	3
20171227/1	2
20171227/2	1
20171227/3	3
20171228	3
20171229/1	5
20171229/2	3
20171230/1	3
20171230/2	3
20171231/1	5
20171231/2	1
20180101	4
20180102	3
20180103	4
20180104	3
20180105	3
20180106	3
20180107	3
20180108	3
20180109	5
20180110	3
20180111	3
20180112	3
20180113	2
20180114	3
20180115	3
20180116	3
20180117	3
20180118	3
20180119	3
20180120	3
20180122	3
20180123	3
20180124	4
20180125	3
20180126	3
20180127	4
20180128	1
20180129	3
20180130	3
20180131	3
20180201	4
20180202	5
20180203	3
20180204	3
20180205	3
20180206	3
20180207	3
20180208	3
20180209	3
20180210	3
20180211/1	3
20180211/2	1
20180212	3
20180213	1
20180214/1	1
20180214/2	1
20180215	3
20180216	3
20180217	4
20180218	5
20180219	3
20180220	3
20180221	3
20180222	3
20180223	4
20180224/1	1
20180224/2	1
20180225	3
20180226	5
20180227	1
20180228	3
20180302	1
20180303	4
20180304	3
20180305	2
20180306	3
20180307/1	2
20180307/2	3
20180308/1	1
20180308/2	3
20180309/1	1
20180309/2	3
20180310	3
20180311	4
20180312	3
20180314	3
20180315	3
20180316/1	3
20180316/2	4
20180316/3	3
20180317/1	3
20180317/2	3
20180318/1	3
20180318/2	3
20180319/1	1
20180319/2	4
20180320	3
20180321	4
20180322	3
20180323	3
20180324	3
20180325	4
20180326	5
20180327	4
20180328/1	1
20180328/2	1
20180328/3	4
20180329	5
20180330/1	2
20180330/2	3
20180331/1	4
20180331/2	3
20180401/1	3
20180401/2	1
20180402/1	3
20180402/2	3
20180403	1
20180405	3
20180406	4
20180407	1
20180408	3
20180409	3
20180410	4
20180411	4
20180412	4
20180413	4
20180414	3
20180415	3
20180416	3
20180417	3
20180418/1	4
20180418/2	1
20180419/1	2
20180419/2	2
20180420	4
20180422/1	4
2018042/2	4
20180423	5
20180424/1	5
20180424/2	3
20180425	5
20180427/1	2
20180427/2	3
20180428	3
20180429	4
20180430/1	2
20180430/2	4
20180502	1
20180504	3
20180505	3
20180507	5
20180508	4
20180509	2
20180510	4
20180511	3
20180513	5
20180514	3
20180516	4
20180517/1	3
20180517/2	1
20180518	1
20180519	3
20180520	5
20180522	1
20180523	3
20180525/1	3
20180525/2	5
20180526/1	2
20180526/2	4
20180528/1	4
20180528/2	4
20180529	4
20180530	3
20180531/1	5
20180531/2	4
20180602	3
20180603	3
20180604/1	2
20180604/2	3
20180605	4
20180606	3
20180607	3
20180608	3
20180609	3
20180610	4
20180611/1	4
20180611/2	4
20180612	5
20180613	3
20180614/1	3
20180614/2	1
20180615	3
20180616/1	4
20180616/2	2
20180617	3
20180618	3
20180619	5
20180620/1	4
20180620/2	5
20180621/1	5
20180621/2	3
20180622/1	4
20180622/2	3
20180623/1	2
20180623/2	5
20180623/3	2
20180624	1
20180625	4
20180627	1
20180628/1	2
20180628/2	4
20180629/1	2
20180629/2	4
20180630	4
20180701/1	5
20180701/2	3
20180702/1	3
20180702/1	3
20180703/1	3
20180703/2	1
20180704/1	3
20180704/2	1
20180705/1	5
20180705/2	4
20180706/1	3
20180706/2	1
20180707/1	3
20180707/2	3
20180708/1	1
20180708/2	4
20180709/1	3
20180709/2	1
20180709/3	1
20180710	1
20180711	3
20180712	1
20180713	1
20180714	4
20180715	1
20180716/1	4
20180716/2	4
20180717	1
20180718/1	1
20180718/2	1
20180719	5
20180720/1	1
20180720/2	4
20180721/1	1
20180721/2	1
20180722	4
20180723/1	3
20180723/2	4
20180724	1
20180725/1	5
20180725/2	1
20180726	4
20180727	1
20180728	1
20180729	3
20180730/1	3
20180730/2	1
20180731	4
20180801	1
20180802/1	1
20180802/2	3
20180803/1	1
20180803/2	5
20180804	1
20180805	4
20180806/1	3
20180806/2	3
20180807	5
20180808	3
20180809	1
20180810/1	1
20180810/2	4
20180811/1	1
20180811/2	3
20180812	3
20180813/1	3
20180813/2	4
20180814/1	3
20180814/2	4
20180815	1
20180816/1	1
20180816/2	3
20180817/1	2
20180817/2	3
20180818/1	1
20180818/2	4
20180818/3	3
20180819	3
20180820/1	4
20180820/2	3
20180821/1	4
20180821/2	3
20180822	3
20180823/1	4
20180823/2	3
20180825	4
20180826/1	3
20180826/2	3
20180826/3	3
20180827	3
20180828/1	1
20180828/2	3
20180829/1	1
20180829/2	3
20180830/1	2
20180830/2	4
20180831	3
20180901	3
20180902	4
20180903/1	3
20180903/2	3
20180904/1	3
20180904/2	3
20180905	3
20180906/1	3
20180906/2	4
20180907	1
20180908	4
20180909	4
20180910/1	3
20180910/2	4
20180911	4
20180912/1	4
20180912/2	4
20180913	3
20180914	4
20180915	3
20180916	3
20180917/1	4
20180917/2	4
20180918	3
20180919/1	1
20180919/2	3
20180920	4
20180921	3
20180922	1
20180923	4
20180924/1	3
20180924/2	5
20180925	4
20180926/1	3
20180926/2	3
20180927	3
20180928	5
20180929	3
20180930	3
20181001	4
20181002	5
20181003	4
20181004/1	4
20181004/2	1
20181005/1	4
20181005/2	4
20181006	3
20181007	5
20181008/1	4
20181008/2	5
20181009	3
20181010/1	5
20181010/2	1
20181011/1	4
20181011/2	1
20181012	3
20181013	4
20181014	4
20181015/1	4
20181015/2	3
20181016/1	1
20181016/2	3
20181017/1	4
20181017/2	5
20181018/1	3
20181018/2	3
20181018/3	3
20181019	3
20181020/1	3
20181020/2	3
20181021	3
20181022/1	4
20181022/2	3
20181023	3
20181024	1
20181025	4
20181026	4
20181027	4
20181028	3
20181029/1	4
20181029/2	4
20181030/1	1
20181030/2	3
20181031	3
20181101/1	4
20181101/2	1
20181102	4
20181103	3
20181104	4
20181105/1	3
20181105/2	4
20181105/3	4
20181106	3
20181107	3
20181108	4
20181109	3
20181110	4
20181111	4
20181112/1	3
20181112/2	3
20181113	5
20181114	5
20181115	3
20181116	4
20181117/1	1
20181117/2	3
20181118	3
20181119/1	4
20181119/2	4
20181120/1	4
20181120/2	5
20181121	1
20181122/1	1
20181122/2	3
20181123	3
20181124	1
20181125	3
20181126/1	3
20181126/2	4
20181127	3
20181128	4
20181129/1	1
20181129/2	4
20181130	3
20181201	3
20181202	4
20181203/1	4
20181203/2	3
20181204	3
20181205/1	5
20181205/2	5
20181206	3
20181207	3
20181208	3
20181209	5
20181210/1	3
20181210/2	4
20181210/3	3
20181211	3
20181212	3
20181213	3
20181214	4
20181215	3
20181216	3
20181217/1	3
20181217/2	3
20181217/3	1
20181218/1	1
20181218/2	3
20181219	3
20181220/1	4
20181220/2	3
20181221	3
20181222/1	1
20181222/2	5
20181223	3
20181224/1	3
20181224/2	1
20181224/3	3
20181225	3
20181226	3
20181227	4
20181228	3
20181229	5
20181231/1	3
20181231/2	3
20181231/3	1
20190103	3
20190104	3
20190105/1	5
20190105/2	3
20190106/1	1
20190106/2	5
20190107/1	3
20190107/2	4
20190108	3
20190109	3
20190110/1	2
20190110/2	3
20190111	3
20190112/1	4
20190112/2	3
20190113	3
20190114/1	3
20190114/2	5
20190115	3
20190116/1	2
20190116/2	5
20190117	3
20190118	3
20190119	5
20190120/1	3
20190120/2	5
20190121/1	4
20190121/2	3
20190123	1
20190124	3
20190125	3
20190126	4
20190127	4
20190128/1	3
20190128/2	3
20190129	3
20190131/1	3
20190131/2	3
20190202	5
20190203	3
20190204/1	4
20190204/2	1
20190205/1	3
20190205/2	3
20190206	3
20190207	3
20190208/1	4
20190208/2	1
20190209	4
20190210	1
20190211/1	3
20190211/2	1
20190212	3
20190214	3
20190215	4
20190216	3
20190218	3
20190219	4
20190220/1	3
20190220/2	3
20190221	3
20190223	4
20190224	3
20190225	5
20190226	3
20190227	3
20190228/1	3
20190228/2	3
20190228/3	3
20190302/1	3
20190302/2	1
20190303	3
20190304	3
20190305	3
20190306	3
20190307/1	3
20190307/2	3
20190308/1	1
20190308/2	1
20190309	3
20190310/1	4
20190310/2	5
20190311/1	2
20190311/2	3
20190313	1
20190314	5
20190315/1	4
20190315/2	3
20190316	3
20190317	3
20190318/1	3
20190318/2	3
20190319	3
20190320/1	3
20190320/2	5
20190321	3
20190322	3
20190323	3
20190324	1
20190325	5
20190326	5
20190327	3
20190328	4
20190329	4
20190330	3
20190331	5
20190402	3
20190403	1
20190404	1
20190405	4
20190406	4
20190407	5
20190408	3
20190409	3
20190410	4
20190411	3
20190412/1	1
20190412/2	3
20190413	1
20190414	3
20190415	4
20190416	5
20190417	4
20190418	3
20190419	4
20190420	3
20190421/1	1
20190421/2	3
20190422/1	1
20190422/2	3
20190423/1	5
20190423/2	2
20190423/3	5
20190425	3
20190426	4
20190427	3
20190428	3
20190429/1	1
20190429/2	4
20190430	3
20190502	3
20190504	4
20190505	3
20190507/1	4
20190507/2	3
20190508	3
20190510	3
20190511	4
20190512	4
20190513	4
20190514	3
20190515	3
20190516	5
20190517	5
20190518	3
20190519	3
20190520	3
20190521	3
20190522	4
20190523	3
20190524	3
20190525	4
20190526	3
20190527	5
20190528/1	4
20190528/2	3
20190530	5
20190531/1	3
20190531/2	4
20190602	5
20190604/1	3
20190604/2	3
20190605	3
20190607	4
20190608	4
20190609	3
20190611	3
20190612	3
20190613	3
20190614	4
20190615	3
20190616	4
20190617	4
20190618	3
20190619	3
20190620	5
20190621	5
20190622	3
20190623	3
20190624	3
20190625	3
20190626	3
20190627	3
20190628	4
20190629	3
20190630	3
20190703	5
20190704	4
20190706	3
20190708	4
20190711	3
20190712	4
20190713	4
20190716	3
20190717	1
20190718	5
20190722	4
20190724	4
20190725	3
20190726	4
20190730	3
20190804	3
20190807	4
20190808	5
20190813	4
20190815	5
20190816	3
20190817	5
20190818	3
20190819	3
20190821	3
20190824	3
20190825/1	1
20190825/2	3
20190826	5
20190827	3
20190828	3
20190830	3
20190902	4
20190909	3
20190913	3
20190915	3
20190916	4
20190920	4
20190921	5
20190922/1	3
20190922/2	3
20190923/1	1
20190923/2	3
20190924	3
20190925	3
20190926	3
20190927	3
20190928/1	3
20190928/2	3
20190929	3
20190930/1	5
20190930/2	5
20191001/1	5
20191001/2	3
20191002	4
20191003	3
20191004	3
20191005	3
20191006	4
20191008	3
20191009	3
20191010	4
20191011	3
20191012	4
20191013	5
20191014	5
20191015	3
20191016	3
20191017	3
20191018	5
20191019	3
20191020	3
20191021	3
20191022	4
20191023	4
20191024	4
20191025	5
20191026	5
20191027	3
20191028	3
20191029	4
20191030	5
20191031	4
20191102	4
20191103/1	4
20191103/2	4
20191104	4
20191105	3
20191106	5
20191107	3
20191108	3
20191109	3
20191111	5
20191112	3
20191113	5
20191114	5
20191115	5
20191116	3
20191117	4
20191118	3
20191119	3
20191120	4
20191121/1	1
20191121/2	4
20191122	3
20191123	5
20191124	3
20191125	3
20191126	5
20191127	3
20191129	4
20191130	3
20191201	5
20191202	4
20191203	5
20191204	3
20191205	5
20191206	3
20191207	5
20191208	5
20191211	3
20191212	3
20191213	3
20191214	4
20191215	3
20191216	4
20191217/1	1
20191217/2	5
20191218	3
20191220	3
20191221	4
20191222/1	2
20191222/2	3
20191223	4
20191224	3
20191226	3
20191227/1	3
20191227/2	3
20191228	5
20191229	5
20191231	3
20200101	5
20200102	3
20200103	2
20200105	4
20200106	5
20200107	2
20200108	3
20200109	3
20200110	2
20200111	1
20200112	4
20200113	3
20200114	4
20200115	4
20200117	3
20200118	5
20200119	3
20200120	5
20200121	5
20200123	5
20200124	3
20200125	5
20200126	4
20200129	4
20200130	3
20200131	4
20200202	5
20200205	5
20200207	2
20200208	3
20200211	5
20200213	4
20200214	1
20200217	3
20200218	4
20200219	5
20200220	4
20200221	4
20200226	3
20200228	3
20200301	3
20200302	4
20200303	3
20200304	3
20200305	4
20200306	5
20200307/1	1
20200307/2	3
20200308	3
20200309	4
20200310	3
20200311/1	5
20200311/2	4
20200313	3
20200314	4
20200315	5
20200316	3
20200317/1	4
20200317/2	3
20200318	4
20200320	3
20200321	3
20200322	4
20200323	4
20200324	3
20200325	3
20200328	5
20200329	4
20200330/1	4
20200330/2	3
20200331	5
20200401/1	3
20200401/2	3
20200403	3
20200404	4
20200406/1	5
20200406/2	3
20200406/3	3
20200407	3
20200408/1	4
20200408/2	3
20200409	3
20200410	3
20200412	3
20200413/1	1
20200413/2	4
20200414/1	4
20200414/2	3
20200415/1	3
20200415/2	5
20200416	3
20200417/1	4
20200417/2	5
20200418	4
20200419	4
20200420	2
20200421/1	5
20200421/2	4
20200422	1
20200423/1	4
20200423/2	4
20200424	1
20200425	5
20200426	3
20200427/1	3
20200427/2	3
20200428	5
20200430	5
20200501	3
20200502	4
20200503/1	1
20200503/2	5
20200504	4
20200506	5
20200507	3
20200508	3
20200509	4
20200510	5
20200511	2
20200512	3
20200513	5
20200514	3
20200515	4
20200516	3
20200517	4
20200518	4
20200519	5
20200520	2
20200521	5
20200522	1
20200523	4
20200524	3
20200525	5
20200527	3
20200528	5
20200530	4
20200531/1	5
20200531/2	5
20200601	5
20200602/1	5
20200602/2	4
20200603	5
20200604/1	4
20200604/2	3
20200606	4
20200607	3
20200608	4
20200609	5
20200611	4
20200613	4
20200614	3
20200615	3
20200616	5
20200618	4
20200619	5
20200621/1	1
20200621/2	5
20200623	3
20200624	3
20200625/1	5
20200625/2	3
20200626	5
20200627	5
20200628	3
20200701	5
20200702	4
20200703	5
20200706	4
20200709	3
20200710	3
20200712	4
20200715	4
20200716	4
20200717	5
20200718	4
20200719	5
20200721	3
20200722	3
20200723	5
20200725/1	5
20200725/2	4
20200726	3
20200727	3
20200728	5
20200729	4
20200801	4
20200802	5
20200804	3
20200806	4
20200808	4
20200810	4
20200811	4
20200812	3
20200814	5
20200815	3
20200816	5
20200817	5
20200820/1	5
20200820/2	5
20200821	4
20200823	3
20200824/1	3
20200824/2	3
20200825	5
20200826	3
20200827	5
20200829	3
20200831	5
20200901	5
20200906	5
20200907	3
20200908	5
20200909	5
20200910	5
20200911	1
20200912	3
20200913/1	5
20200913/2	5
20200914	5

## Sheet: Comment analysis
The date and the number of the Facebook post	The number of the comment at the given FB post	The combinations of reactions						Reactions	Facebook user's sex			Sex	On-topic / Off-topic comment	Experiential Processes					Behavioral Processes					Change talk							Sustain talk
		Like	Love	Haha	Wow	Sad	Angry							Consciousness-raising	Dramatic relief	Social liberation	Self-reevaluation	Environmental reevaluation	Self-liberation	Reinforcement management	Helping relationships	Stimulus control	Counterconditioning	Preparatory change talk (DARN)				Mobilizing change talk (CAT)
									Male	Female	Unknown													Desire	Ability	Reason	Need	Commitment	Activation	Taking steps
20170308/2	1	0	0	0	0	0	0	0	1	0	0	1	1	0	0	1	0	0	1	0	0	0	0	0	0	1	0	1	0	0	2
20170308/2	2	0	0	0	0	0	0	0	1	0	0	1	1	0	0	0	1	0	0	0	0	1	0	1	0	1	0	0	0	1	0
20170308/2	3	0	0	0	0	0	0	0	0	1	0	2	2
20170308/2	4	0	0	0	0	0	0	0	1	0	0	1	2
20170308/2	5	0	0	0	0	0	0	0	0	1	0	2	2
20170308/2	6	0	0	0	0	0	0	0	1	0	0	1	2
20170308/2	7	0	0	0	0	0	0	0	0	1	0	2	2
20170319	1	0	0	0	0	0	0	0	0	1	0	2	1	0	0	0	1	0	1	1	0	0	0	0	0	0	0	0	1	1	0
20170319	2	0	0	0	0	0	0	0	1	0	0	1	2
20170324	1	0	0	0	0	0	0	0	0	1	0	2	1	0	0	0	0	1	0	0	0	0	0	0	0	1	0	0	0	1	0
20170408/1	1	0	0	0	0	0	0	0	0	1	0	2	1	0	0	0	0	0	0	0	0	0	0	0	0	1	0	1	0	0	0
20170408/1	2	0	0	0	0	0	0	0	1	0	0	1	2
20170408/2	1	1	0	0	0	0	0	1	0	1	0	2	1	0	0	0	1	0	0	0	0	0	0	0	0	1	0	0	0	1	0
20170408/2	2	0	0	0	0	0	0	0	0	1	0	2	1											0	0	0	0	0	0	1	0
20170408/2	3	0	0	0	0	0	0	0	1	0	0	1	2
20170413	1	0	0	0	0	0	0	0	1	0	0	1	1											0	0	0	0	0	0	0	1
20170418	1	0	0	0	0	0	0	0	0	1	0	2	1	0	0	0	0	0	0	0	0	0	0	0	0	1	0	0	0	1	0
20170424	1	0	0	0	0	0	0	0	1	0	0	1	1	0	0	0	1	0	0	0	0	0	0	1	0	0	0	0	0	0	1
20170628	1	1	0	0	0	0	0	1	0	1	0	2	1											0	0	0	0	0	0	0	1
20170829	1	0	0	0	0	0	0	0	1	0	0	1	1	0	0	0	0	0	0	0	0	0	0	0	0	1	0	0	0	0	1
20170829	2	0	0	1	0	0	0	3	0	1	0	2	1											0	0	0	0	0	0	0	1
20171124	1	0	0	0	0	0	0	0	0	1	0	2	1	1	0	0	0	0	0	0	0	0	0	1	0	0	0	0	0	0	0
20171206/2	1	0	0	0	0	0	0	0	0	1	0	2	1	1	0	0	0	0	0	0	0	0	0	0	0	0	0	1	0	0	1
20171229/1	1	0	0	0	0	0	0	0	1	0	0	1	1											0	0	0	0	0	0	0	1
20171229/1	2	0	0	0	0	0	0	0	1	0	0	1	2
20171231/1	1	0	0	0	0	0	0	0	1	0	0	1	1	0	0	0	0	0	0	0	0	0	0	0	0	0	0	1	0	1	1
20180109	1	1	0	0	0	0	0	1	0	1	0	2	1	0	0	0	0	0	0	1	0	0	0	0	0	0	0	0	0	1	0
20180202	1	1	0	0	0	0	0	1	0	1	0	2	1	0	0	0	0	0	0	0	0	0	0	0	0	1	0	0	0	0	1
20180218	1	0	0	0	0	0	0	0	0	1	0	2	1											0	0	0	0	0	0	1	2
20180218	2	0	0	0	0	0	0	0	0	1	0	2	1	0	0	0	0	0	0	0	0	0	1	0	0	0	0	0	1	0	1
20180218	3	0	0	0	0	0	0	0	0	1	0	2	1	0	0	0	0	0	1	0	1	0	0	0	1	0	0	0	0	1	0
20180218	4	0	0	0	0	0	0	0	0	1	0	2	1	0	0	0	1	0	0	0	0	0	0	0	0	1	0	0	0	1	2
20180226	1	0	0	0	0	0	0	0	1	0	0	1	1											0	0	0	0	0	0	0	2
20180226	2	1	0	0	0	0	0	1	0	1	0	2	1	0	0	0	0	0	0	0	0	0	0	0	0	1	0	0	0	0	1
20180326	1	0	0	0	0	0	0	0	1	0	0	1	1											0	0	0	0	0	0	0	1
20180326	2	0	0	0	0	0	0	0	0	1	0	2	1											0	0	0	0	0	0	0	1
20180326	3	0	0	0	0	0	0	0	1	0	0	1	2
20180326	4	0	0	0	0	0	0	0	0	1	0	2	2
20180328/1	1	0	0	0	0	0	0	0	1	0	0	1	1	1	0	0	0	0	0	0	0	0	0	0	0	0	1	0	0	1	1
20180328/1	2	0	0	0	0	0	0	0	0	0	1	3	2
20180329	1	0	0	0	0	0	0	0	1	0	0	1	1	0	0	0	0	0	0	0	0	0	1	0	0	0	0	0	0	1	0
20180329	2	1	0	0	0	0	0	1	1	0	0	1	2
20180329	3	0	0	0	0	0	0	0	1	0	0	1	2
20180329	4	0	0	0	0	0	0	0	0	1	0	2	2
20180423	1	0	0	0	0	0	0	0	0	1	0	2	1											0	0	0	0	0	0	1	0
20180423	2	1	0	0	0	0	0	1	0	1	0	2	1	0	0	0	0	0	0	1	0	0	0	0	0	0	0	0	0	1	0
20180423	3	0	0	0	0	0	0	0	1	0	0	1	2
20180423	4	0	0	0	0	0	0	0	1	0	0	1	2
20180423	5	0	0	0	0	0	0	0	1	0	0	1	2
20180423	6	0	0	0	0	0	0	0	1	0	0	1	2
20180424/1	1	0	0	0	0	0	0	0	1	0	0	1	1	1	0	0	0	0	0	0	0	0	0	0	0	0	1	0	0	0	0
20180424/1	2	1	0	0	0	0	0	1	1	0	0	1	2
20180425	1	0	0	0	0	0	0	0	1	0	0	1	1											0	0	0	0	0	0	0	1
20180425	2	0	0	0	0	0	0	0	1	0	0	1	1	0	0	0	0	0	0	0	0	0	0	0	0	1	0	0	0	0	0
20180425	3	0	0	0	0	0	0	0	0	1	0	2	1	0	0	0	0	0	0	0	0	0	0	0	0	1	0	0	0	0	0
20180425	4	0	0	0	0	0	0	0	1	0	0	1	1	0	0	0	0	0	0	0	0	0	0	0	0	1	0	0	0	0	1
20180425	5	1	0	0	0	0	0	1	0	1	0	2	2
20180507	1	0	0	0	0	0	0	0	1	0	0	1	1											0	0	0	0	0	0	1	2
20180507	2	0	0	0	0	0	0	0	1	0	0	1	2
20180513	1	0	0	0	0	0	0	0	1	0	0	1	1											0	0	0	0	0	0	0	1
20180513	2	0	0	1	0	0	0	3	0	1	0	2	2
20180513	3	1	0	0	0	0	0	1	0	1	0	2	2
20180513	4	0	0	0	0	0	0	0	1	0	0	1	2
20180520	1	0	0	0	0	0	0	0	1	0	0	1	1											0	0	0	0	0	0	0	1
20180520	2	0	0	0	0	0	0	0	1	0	0	1	1											0	0	0	0	0	0	0	1
20180520	3	1	0	0	0	0	0	1	1	0	0	1	1											0	0	0	0	0	0	0	1
20180520	4	0	0	0	0	0	0	0	1	0	0	1	1											0	0	0	0	0	0	0	1
20180520	5	0	0	0	0	0	0	0	1	0	0	1	2
20180520	6	0	0	0	0	0	0	0	1	0	0	1	2
20180520	7	0	0	0	0	0	0	0	1	0	0	1	2
20180520	8	0	0	0	0	0	0	0	0	1	0	2	2
20180520	9	0	0	0	0	0	0	0	0	1	0	2	2
20180520	10	0	0	0	0	0	0	0	1	0	0	1	2
20180525/2	1	0	0	1	0	0	0	3	0	1	0	2	1											0	0	0	0	0	0	0	1
20180531/1	1	0	0	0	0	0	0	0	1	0	0	1	1											0	0	0	0	0	0	0	1
20180531/1	2	1	0	0	0	0	0	1	1	0	0	1	2
20180531/1	3	0	0	0	0	0	0	0	1	0	0	1	2
20180612	1	1	0	0	0	0	0	1	0	1	0	2	1	0	0	0	1	0	0	0	0	0	0	0	0	0	1	0	0	1	0
20180612	2	0	0	0	0	0	0	0	0	1	0	2	1	0	0	0	0	0	1	0	0	0	0	0	0	0	0	0	0	1	1
20180612	3	1	0	0	0	0	0	1	0	1	0	2	2
20180612	4	0	0	0	0	0	0	0	1	0	0	1	2
20180619	1	0	0	0	0	0	0	0	0	1	0	2	1	0	0	0	1	0	0	0	0	0	0	0	0	0	1	0	0	1	1
20180619	2	0	0	0	0	0	0	0	0	1	0	2	1	1	0	0	0	0	0	0	0	0	0	0	0	0	1	0	0	0	0
20180619	3	1	0	0	0	0	0	1	0	1	0	2	2
20180619	4	0	0	0	0	0	0	0	1	0	0	1	2
20180619	5	0	0	0	0	0	0	0	0	1	0	2	2
20180619	6	0	0	0	0	0	0	0	0	1	0	2	2
20180619	7	1	0	0	0	0	0	1	1	0	0	1	2
20180619	8	0	0	0	0	0	0	0	1	0	0	1	2
20180619	9	0	0	0	0	0	0	0	0	1	0	2	2
20180619	10	1	0	0	0	0	0	1	1	0	0	1	2
20180619	11	0	0	0	0	0	0	0	0	1	0	2	2
20180620/2	1	0	0	0	0	0	0	0	1	0	0	1	1											0	0	0	0	0	0	0	1
20180621/1	1	0	0	0	0	0	0	0	1	0	0	1	1	0	0	0	1	0	0	0	0	0	0	0	0	1	0	0	0	1	0
20180621/1	2	0	0	0	0	0	0	0	0	1	0	2	2
20180623/2	1	0	0	0	0	0	0	0	0	1	0	2	1	0	1	0	0	1	0	0	0	0	0	0	0	1	0	0	0	1	0
20180701/1	1	0	0	0	0	0	0	0	1	0	0	1	1											0	0	0	0	0	0	0	1
20180701/1	2	0	1	0	0	0	0	2	1	0	0	1	2
20180705/1	1	0	0	0	0	0	0	0	1	0	0	1	2
20180705/1	2	0	0	0	0	0	0	0	0	1	0	2	2
20180719	1	0	0	0	0	0	1	6	1	0	0	1	1	0	0	0	1	0	0	0	0	0	0	0	0	0	0	0	0	0	2
20180725/1	1	0	0	0	0	0	0	0	1	0	0	1	2
20180725/1	2	0	0	0	0	0	0	0	1	0	0	1	2
20180725/1	3	0	0	0	0	0	0	0	1	0	0	1	2
20180803/2	1	0	0	0	0	0	0	0	1	0	0	1	2
20180807	1	0	0	0	0	0	0	0	0	1	0	2	1	0	0	0	0	0	0	0	0	0	0	0	0	0	0	0	0	0	1
20180807	2	0	0	0	0	0	0	0	0	1	0	2	1	0	0	0	0	0	0	0	0	0	0	0	0	0	1	0	0	0	1
20180807	3	1	0	0	0	0	0	1	0	1	0	2	2
20180807	4	0	0	0	0	0	0	0	1	0	0	1	2
20180924/2	1	0	0	0	0	0	0	0	0	1	0	2	1	1	0	0	0	0	0	0	0	0	0	0	0	0	1	0	0	0	1
20180924/2	2	0	0	0	0	0	0	0	0	1	0	2	1	0	0	0	0	0	0	0	1	0	0	0	0	0	1	0	0	0	1
20180928	1	0	0	0	0	0	0	0	1	0	0	1	1	0	0	0	1	0	0	0	0	0	0	0	0	0	1	0	0	0	1
20180928	2	0	0	0	0	0	0	0	1	0	0	1	2
20181002	1	1	0	0	0	0	0	1	0	1	0	2	1											0	0	0	0	0	0	1	0
20181002	2	0	0	0	0	0	0	0	1	0	0	1	1	1	0	0	0	0	1	0	0	0	0	1	0	0	0	0	0	0	1
20181002	3	1	0	0	0	0	0	1	1	0	0	1	2
20181007	1	0	0	0	0	0	0	0	0	1	0	2	1	0	1	0	0	0	0	0	0	0	0	0	0	1	0	0	0	0	1
20181008/2	1	0	0	0	0	0	0	0	0	1	0	2	1	0	0	0	1	0	0	0	0	0	0	1	0	0	0	0	0	0	1
20181008/2	2	0	0	0	0	0	0	0	1	0	0	1	2
20181008/2	3	1	0	0	0	0	0	1	0	1	0	2	2
20181010/1	1	0	0	0	0	0	0	0	1	0	0	1	1	0	0	0	0	0	0	0	0	0	0	0	0	0	0	0	1	1	1
20181010/1	2	1	0	0	0	0	0	1	0	1	0	2	2
20181017/2	1	0	0	0	0	0	0	0	0	1	0	2	1	0	0	0	0	1	0	0	0	0	0	0	0	1	0	0	0	1	0
20181017/2	2	0	0	0	0	0	0	0	1	0	0	1	1	0	0	0	0	0	0	0	1	0	0	0	0	0	0	0	0	1	0
20181017/2	3	0	0	0	0	0	0	0	1	0	0	1	2
20181113	1	0	0	0	0	0	0	0	0	1	0	2	1	0	0	0	0	1	0	0	0	0	0	0	0	1	0	0	0	0	0
20181114	1	0	0	0	0	0	0	0	1	0	0	1	1											0	0	0	0	0	0	0	1
20181114	2	0	0	0	0	0	0	0	1	0	0	1	2
20181114	3	0	0	0	0	0	0	0	0	1	0	2	2
20181120/2	1	0	0	0	0	0	0	0	0	1	0	2	1	0	0	0	0	0	1	0	0	0	0	0	1	1	0	0	0	1	0
20181120/2	2	1	0	0	0	0	0	1	0	1	0	2	1	0	0	0	0	0	1	0	0	0	0	0	0	0	0	1	0	1	0
20181120/2	3	1	0	0	0	0	0	1	0	1	0	2	2
20181120/2	4	0	0	0	0	0	0	0	1	0	0	1	2
20181205/1	1	0	0	0	0	0	0	0	1	0	0	1	1											0	0	0	0	0	0	0	1
20181205/2	1	0	0	0	0	0	0	0	0	1	0	2	1	0	0	0	1	0	0	0	0	0	0	0	0	0	0	0	0	1	0
20181205/2	2	0	0	0	0	0	0	0	0	1	0	2	2
20181205/2	3	0	0	1	0	0	0	3	0	1	0	2	2
20181205/2	4	0	0	0	0	0	0	0	0	1	0	2	2
20181205/2	5	0	0	0	0	0	0	0	0	1	0	2	2
20181209	1	1	0	0	0	0	0	1	0	1	0	2	1											0	0	0	0	0	0	0	1
20181222/2	1	0	0	0	0	0	0	0	1	0	0	1	1											0	0	0	0	0	0	0	1
20181229	1	0	0	0	0	0	0	0	1	0	0	1	1	0	0	0	0	0	0	0	0	0	0	0	0	1	0	0	0	0	0
20181229	2	0	0	1	0	0	0	3	1	0	0	1	2
20190105/1	1	0	0	0	0	0	0	0	1	0	0	1	1											0	0	0	0	0	0	0	1
20190105/1	2	0	0	0	0	0	0	0	1	0	0	1	1											0	0	0	0	0	0	0	1
20190105/1	3	0	0	0	0	0	0	0	1	0	0	1	1											0	0	0	0	0	0	0	1
20190105/1	4	0	0	0	0	0	0	0	0	1	0	2	2
20190105/1	5	1	0	0	0	0	0	1	1	0	0	1	2
20190105/1	6	0	0	0	0	0	0	0	1	0	0	1	2
20190105/1	7	0	0	0	0	0	0	0	0	1	0	2	2
20190105/1	8	0	0	0	0	0	0	0	0	1	0	2	2
20190106/2	1	0	0	0	0	0	0	0	1	0	0	1	1	0	0	0	0	0	1	0	0	0	0	0	0	0	0	0	1	1	1
20190114/2	1	0	0	0	0	0	0	0	0	1	0	2	1	0	0	0	1	0	0	0	0	0	0	0	0	0	0	1	0	1	1
20190114/2	2	1	0	0	0	0	0	1	1	0	0	1	2
20190114/2	3	0	0	0	0	0	0	0	1	0	0	1	2
20190116/2	1	0	0	0	0	0	0	0	1	0	0	1	1	0	0	0	0	0	0	0	0	0	0	0	0	1	0	0	0	0	1
20190116/2	2	1	0	0	0	0	0	1	0	1	0	2	1	0	0	0	0	0	0	0	0	0	0	0	0	1	0	0	0	0	0
20190116/2	3	0	0	0	0	0	0	0	1	0	0	1	2
20190119	1	1	0	0	0	0	0	1	1	0	0	1	1	0	0	0	0	0	0	0	0	0	0	0	0	0	0	0	0	1	1
20190120/2	1	0	1	0	0	0	0	2	1	0	0	1	1	0	0	0	1	0	1	0	0	0	0	1	0	0	0	1	0	1	0
20190202	1	0	0	0	0	0	0	0	1	0	0	1	1	0	0	0	0	0	1	0	0	0	0	0	0	0	0	0	0	1	0
20190202	2	0	0	0	0	0	0	0	1	0	0	1	1	0	0	0	0	0	0	0	0	0	0	0	0	0	0	0	1	1	1
20190202	3	0	0	1	0	0	0	3	1	0	0	1	1	0	0	0	0	0	0	0	0	0	0	0	0	0	0	0	0	1	0
20190202	4	0	0	1	0	0	0	3	1	0	0	1	1	0	0	0	0	0	0	0	1	0	0	1	0	0	0	0	0	1	1
20190202	5	0	0	0	0	0	0	0	1	0	0	1	1											0	0	0	0	0	0	1	0
20190202	6	0	0	0	0	0	0	0	0	1	0	2	2
20190202	7	0	0	0	0	0	0	0	1	0	0	1	2
20190202	8	0	0	0	0	0	0	0	0	1	0	2	2
20190202	9	0	0	1	0	0	0	3	0	1	0	2	2
20190202	10	1	0	0	0	0	0	1	0	1	0	2	2
20190202	11	0	0	0	0	0	0	0	1	0	0	1	2
20190202	12	0	0	0	0	0	0	0	1	0	0	1	2
20190202	13	0	0	0	0	0	0	0	0	1	0	2	2
20190225	1	1	0	0	0	0	0	1	0	1	0	2	1	0	0	0	0	0	0	0	0	0	0	0	0	0	0	0	0	1	0
20190225	2	0	0	0	0	0	0	0	0	1	0	2	1	0	0	0	0	0	0	1	0	0	0	0	0	0	0	0	0	1	0
20190310/2	1	0	0	0	0	0	0	0	1	0	0	1	1	0	0	0	1	0	0	0	0	0	0	1	0	0	0	0	0	0	1
20190310/2	2	0	0	0	0	0	0	0	0	1	0	2	2
20190310/2	3	0	0	0	0	0	0	0	0	1	0	2	2
20190310/2	4	0	0	0	0	0	0	0	0	1	0	2	2
20190314	1	1	0	0	0	0	0	1	0	1	0	2	1	0	0	0	0	0	0	0	1	0	0	0	0	0	0	0	0	1	0
20190314	2	0	0	0	0	0	0	0	1	0	0	1	2
20190320/2	1	0	0	0	0	0	0	0	1	0	0	1	1	0	0	0	0	0	1	0	0	0	0	0	0	0	0	0	0	1	0
20190325	1	0	0	0	0	0	0	0	1	0	0	1	1	0	0	0	0	0	1	0	0	0	0	0	0	0	0	0	0	1	0
20190326	1	1	0	0	0	0	0	1	0	1	0	2	1	0	0	0	0	0	0	0	0	0	0	0	0	0	0	0	0	1	0
20190326	2	0	0	0	0	0	0	0	0	1	0	2	1	0	0	0	0	1	0	0	0	0	0	0	0	1	0	0	0	1	0
20190326	3	0	0	0	0	0	0	0	0	1	0	2	1	0	0	0	0	1	0	0	0	0	0	0	0	1	0	0	0	1	0
20190326	4	0	0	0	0	0	0	0	1	0	0	1	1	0	0	0	1	0	0	0	0	0	0	0	0	1	0	0	0	0	0
20190326	5	0	1	0	0	0	0	2	0	1	0	2	1	0	0	0	0	0	0	0	0	0	0	0	0	0	0	0	0	1	0
20190326	6	0	0	0	0	0	0	0	0	1	0	2	1	0	0	0	1	0	0	0	0	0	0	0	0	1	1	0	0	1	0
20190326	7	0	0	0	0	0	0	0	0	1	0	2	1	0	0	0	0	1	0	0	0	0	0	0	0	1	1	0	0	1	1
20190326	8	0	0	0	0	0	0	0	0	1	0	2	1	0	0	0	1	1	0	0	0	0	0	0	0	1	0	0	1	1	0
20190326	9	0	0	0	0	0	0	0	0	1	0	2	1	0	0	0	1	1	0	0	0	0	0	0	0	1	0	0	1	1	1
20190326	10	0	0	0	0	0	0	0	0	1	0	2	1	0	0	0	0	1	0	0	0	0	0	0	0	1	0	0	0	1	0
20190326	11	0	0	0	0	0	0	0	0	1	0	2	1	0	0	0	0	1	0	0	0	0	0	0	0	1	0	0	0	1	0
20190326	12	1	0	0	0	0	0	1	0	1	0	2	1	0	0	0	0	1	0	0	0	0	0	0	0	1	0	0	0	1	0
20190326	13	1	0	0	0	0	0	1	0	1	0	2	1	0	0	0	0	1	0	0	0	0	0	0	0	1	0	0	0	1	0
20190326	14	0	0	0	0	0	0	0	0	1	0	2	1	0	0	0	0	1	0	0	0	0	0	0	0	1	0	0	0	1	0
20190326	15	0	0	0	0	0	0	0	0	1	0	2	1	0	0	0	0	1	0	0	0	0	0	0	0	1	0	0	0	1	0
20190326	16	0	0	0	0	0	0	0	0	1	0	2	1	0	0	0	1	1	0	0	0	0	0	0	0	1	0	0	0	1	0
20190326	17	0	0	0	0	0	0	0	0	1	0	2	1	0	0	0	1	1	0	0	0	0	0	0	0	1	0	0	0	1	2
20190326	18	0	0	0	0	0	0	0	0	1	0	2	1	0	0	0	1	1	0	0	0	0	0	0	0	1	0	0	1	1	0
20190326	19	0	0	0	0	0	0	0	0	1	0	2	1	0	0	0	0	1	0	0	0	0	0	0	0	1	0	0	0	1	0
20190326	20	0	0	0	0	0	0	0	0	1	0	2	1	0	0	0	0	1	0	0	0	0	0	0	0	1	0	0	0	1	0
20190326	21	0	0	0	0	0	0	0	0	1	0	2	1	0	0	0	0	1	0	0	0	0	0	0	0	1	0	0	0	0	0
20190326	22	0	0	0	0	0	0	0	0	1	0	2	1	0	0	0	0	1	0	0	0	0	0	0	0	1	1	0	0	1	0
20190326	23	0	0	0	0	0	0	0	0	1	0	2	1	0	0	0	0	1	0	0	0	0	0	0	0	1	0	0	0	1	0
20190326	24	0	0	0	0	0	0	0	0	1	0	2	1	0	0	0	0	1	0	0	0	0	0	0	0	1	0	0	0	1	0
20190326	25	0	0	0	0	0	0	0	0	1	0	2	1	0	0	0	0	1	0	0	0	0	0	0	0	1	0	0	0	1	0
20190326	26	0	0	0	0	0	0	0	0	1	0	2	2
20190326	27	0	0	0	0	0	0	0	0	1	0	2	2
20190326	28	0	0	1	0	0	0	3	0	1	0	2	2
20190326	29	0	0	0	0	0	0	0	1	0	0	1	2
20190331	1	1	0	0	0	0	0	1	0	1	0	2	1	0	0	0	1	0	0	0	0	0	0	1	0	0	0	0	0	0	0
20190407	1	1	0	0	0	0	0	1	1	0	0	1	1											0	0	0	0	0	0	0	1
20190407	2	0	0	0	0	0	0	0	1	0	0	1	1	1	0	0	0	0	1	0	1	0	1	0	0	0	0	1	0	1	1
20190416	1	0	0	0	0	0	0	0	0	1	0	2	1	0	0	0	0	1	0	0	0	0	0	0	0	1	1	0	0	0	1
20190416	2	0	0	0	0	0	0	0	1	0	0	1	2
20190423/1	1	1	0	0	0	0	0	1	0	1	0	2	1	0	0	0	1	0	0	0	0	0	0	0	0	0	0	0	0	1	0
20190423/1	2	0	0	0	0	0	0	0	1	0	0	1	2
20190423/3	1	0	0	0	0	0	0	0	1	0	0	1	1											0	0	0	0	0	0	0	1
20190516	1	0	0	0	0	0	0	0	1	0	0	1	1											0	0	0	0	0	0	0	1
20190516	2	1	0	0	0	0	0	1	1	0	0	1	2
20190517	1	0	0	0	0	0	0	0	0	1	0	2	1											0	0	0	0	0	0	0	1
20190517	2	0	0	0	0	0	0	0	1	0	0	1	2
20190527	1	0	0	0	0	0	0	0	0	1	0	2	1	0	0	0	1	0	0	0	0	0	0	0	0	0	1	0	1	0	1
20190530	1	0	0	0	0	0	0	0	0	1	0	2	1	1	0	0	0	0	0	0	0	0	0	0	0	0	1	0	0	0	0
20190602	1	0	0	0	0	0	0	0	0	1	0	2	1											0	0	0	0	0	0	1	0
20190602	2	0	0	0	0	0	0	0	1	0	0	1	2
20190602	3	0	0	0	0	0	0	0	1	0	0	1	2
20190602	4	0	0	0	0	0	0	0	1	0	0	1	2
20190602	5	0	0	0	0	0	0	0	1	0	0	1	2
20190620	1	0	0	0	0	0	0	0	1	0	0	1	1											0	0	0	0	0	0	0	1
20190620	2	0	0	0	0	0	0	0	1	0	0	1	1	0	0	0	0	0	0	0	0	0	0	0	0	1	0	0	0	1	0
20190621	1	0	0	0	0	0	0	0	0	1	0	2	1	0	0	0	0	0	0	1	0	0	0	0	0	0	0	0	0	1	0
20190703	1	0	0	0	0	0	0	0	1	0	0	1	1	0	0	0	0	0	0	0	1	0	1	0	0	1	1	0	0	1	2
20190703	2	0	0	0	0	0	0	0	1	0	0	1	2
20190718	1	1	0	0	0	0	0	1	1	0	0	1	1	1	0	0	1	0	0	0	0	0	0	1	0	0	0	0	0	0	0
20190808	1	0	0	0	0	0	0	0	0	1	0	2	1	0	0	0	0	0	0	0	0	0	0	0	0	0	1	0	0	0	1
20190808	2	0	0	0	0	0	0	0	0	1	0	2	1											0	0	0	0	0	0	0	1
20190808	3	0	0	0	0	0	0	0	0	1	0	2	1											0	0	0	0	0	0	0	1
20190808	4	0	0	0	0	0	0	0	1	0	0	1	1	0	0	0	1	0	0	0	0	0	0	0	0	0	0	0	0	1	0
20190808	5	0	0	0	0	0	0	0	0	1	0	2	2
20190808	6	0	0	0	0	0	0	0	1	0	0	1	2
20190808	7	0	0	0	0	0	0	0	1	0	0	1	2
20190808	8	0	0	0	0	0	0	0	0	1	0	2	2
20190815	1	1	0	0	0	0	0	1	1	0	0	1	1											0	0	0	0	0	0	0	1
20190817	1	0	0	0	0	0	0	0	0	1	0	2	1	0	0	0	0	0	1	0	0	0	0	0	0	0	0	0	0	1	0
20190817	2	0	0	0	0	0	0	0	1	0	0	1	2
20190826	1	1	0	0	0	0	0	1	1	0	0	1	1	1	0	0	0	0	0	0	0	0	0	0	0	0	0	1	0	0	0
20190826	2	0	0	1	0	0	0	3	1	0	0	1	2
20190921	1	0	0	0	0	0	0	0	1	0	0	1	1	0	0	0	0	0	0	0	0	0	0	0	0	0	1	0	0	0	1
20190921	2	0	0	0	0	0	0	0	1	0	0	1	2
20190930/1	1	0	0	0	0	0	0	0	0	1	0	2	1											0	0	0	0	0	0	0	1
20190930/1	2	1	0	0	0	0	0	1	1	0	0	1	2
20190930/1	3	1	0	0	0	0	0	1	0	1	0	2	2
20190930/2	1	0	0	0	0	0	0	0	1	0	0	1	1											0	0	0	0	0	0	0	1
20190930/2	2	0	0	0	0	0	0	0	1	0	0	1	1	0	0	0	0	0	0	0	0	0	0	0	0	0	0	0	0	1	0
20190930/2	3	1	0	0	0	0	0	1	0	1	0	2	1	0	0	0	0	0	1	0	0	0	0	0	0	0	0	0	0	1	0
20190930/2	4	0	0	0	0	0	0	0	1	0	0	1	2
20190930/2	5	0	0	0	0	0	0	0	0	1	0	2	2
20190930/2	6	0	0	0	0	0	0	0	1	0	0	1	2
20190930/2	7	0	0	0	0	0	0	0	0	1	0	2	2
20190930/2	8	0	0	0	0	0	0	0	0	1	0	2	2
20190930/2	9	0	0	0	0	0	0	0	1	0	0	1	2
20190930/2	10	0	0	0	0	0	0	0	1	0	0	1	2
20190930/2	11	0	0	0	0	0	0	0	1	0	0	1	2
20190930/2	12	0	0	0	0	0	0	0	1	0	0	1	2
20190930/2	13	0	0	0	0	0	0	0	1	0	0	1	2
20190930/2	14	0	0	0	0	0	0	0	0	1	0	2	2
20190930/2	15	0	0	0	0	0	0	0	1	0	0	1	2
20190930/2	16	0	0	0	0	0	0	0	1	0	0	1	2
20190930/2	17	0	0	0	0	0	0	0	0	1	0	2	2
20190930/2	18	0	0	0	0	0	0	0	0	1	0	2	2
20190930/2	19	0	0	0	0	0	0	0	1	0	0	1	2
20190930/2	20	0	0	0	0	0	0	0	0	1	0	2	2
20190930/2	21	0	0	0	0	0	0	0	1	0	0	1	2
20190930/2	22	0	0	0	0	0	0	0	1	0	0	1	2
20190930/2	23	0	0	0	0	0	0	0	0	1	0	2	2
20190930/2	24	0	0	0	0	0	0	0	1	0	0	1	2
20190930/2	25	0	0	0	0	0	0	0	1	0	0	1	2
20190930/2	26	0	0	0	0	0	0	0	1	0	0	1	2
20190930/2	27	0	0	0	0	0	0	0	0	1	0	2	2
20191001/1	1	1	0	0	0	0	0	1	1	0	0	1	1	0	0	0	0	0	0	0	0	0	0	0	0	0	0	0	0	1	0
20191001/1	2	0	0	0	0	0	0	0	1	0	0	1	1	0	0	0	0	0	0	0	0	0	0	0	0	0	0	0	0	1	0
20191001/1	3	0	0	0	0	0	0	0	1	0	0	1	1	0	0	0	0	0	0	0	0	0	0	1	0	0	0	0	0	1	1
20191001/1	4	0	0	0	0	0	0	0	1	0	0	1	1											0	0	0	0	0	0	0	1
20191001/1	5	0	1	0	0	0	0	2	1	0	0	1	2
20191001/1	6	0	0	0	0	0	0	0	1	0	0	1	2
20191001/1	7	1	0	0	0	0	0	1	0	1	0	2	2
20191001/1	8	0	0	0	0	0	0	0	1	0	0	1	2
20191001/1	9	0	0	0	0	0	0	0	0	1	0	2	2
20191001/1	10	0	0	0	0	0	0	0	1	0	0	1	2
20191013	1	0	0	0	0	0	0	0	0	1	0	2	1	0	0	0	0	0	0	0	0	0	1	0	0	0	0	0	1	1	1
20191013	2	0	0	0	0	0	0	0	0	1	0	2	2
20191013	3	0	0	0	0	0	0	0	1	0	0	1	2
20191013	4	0	0	0	0	0	0	0	1	0	0	1	2
20191014	1	0	0	1	0	0	0	3	1	0	0	1	1	0	0	0	0	0	0	0	0	1	0	0	0	0	0	0	0	1	1
20191014	2	1	0	0	0	0	0	1	0	1	0	2	1	0	0	0	1	0	1	0	0	0	0	0	0	0	0	0	1	1	1
20191014	3	0	0	0	0	0	0	0	1	0	0	1	1	0	0	0	0	0	0	0	0	0	0	0	0	0	0	0	0	1	0
20191014	4	0	0	0	0	0	0	0	1	0	0	1	2
20191014	5	0	0	0	0	0	0	0	1	0	0	1	2
20191014	6	0	0	0	0	0	0	0	1	0	0	1	2
20191014	7	1	0	0	0	0	0	1	0	1	0	2	2
20191018	1	1	0	0	0	0	0	1	0	1	0	2	1	0	0	0	0	0	0	0	0	0	0	0	0	0	0	0	0	1	0
20191018	2	0	0	0	0	0	0	0	0	1	0	2	1	0	1	0	1	0	0	0	0	0	0	0	0	1	1	0	0	0	0
20191018	3	0	0	0	0	0	0	0	0	1	0	2	1	0	1	0	1	0	0	0	0	0	0	0	0	1	1	0	0	1	0
20191018	4	0	0	0	0	0	0	0	1	0	0	1	1	0	0	0	0	0	0	0	0	0	0	0	0	0	0	0	0	1	0
20191025	1	0	0	0	0	0	0	0	0	1	0	2	1	0	0	0	0	0	1	0	0	0	0	0	0	0	0	0	0	1	0
20191025	2	0	0	0	0	0	0	0	1	0	0	1	2
20191025	3	0	0	0	0	0	0	0	1	0	0	1	2
20191025	4	0	0	0	1	0	0	4	1	0	0	1	2
20191026	1	0	0	0	0	0	0	0	0	0	1	3	1	0	0	0	0	0	0	0	0	0	0	0	0	0	0	0	0	1	0
20191030	1	0	0	0	0	0	0	0	0	1	0	2	1	0	0	0	0	0	1	0	0	0	0	0	1	0	0	0	0	1	0
20191030	2	0	0	1	0	0	0	3	0	1	0	2	1	0	0	0	0	0	0	0	0	0	1	0	0	0	0	0	0	1	0
20191030	3	0	1	0	0	0	0	2	1	0	0	1	1	0	0	0	0	0	1	0	0	0	0	1	0	0	0	0	0	1	2
20191030	4	0	0	0	0	0	0	0	1	0	0	1	2
20191030	5	0	0	0	0	0	0	0	1	0	0	1	2
20191030	6	0	0	0	0	0	0	0	1	0	0	1	2
20191030	7	1	0	0	0	0	0	1	1	0	0	1	2
20191106	1	0	0	0	0	0	0	0	0	1	0	2	1											0	0	0	0	0	0	0	1
20191106	2	0	0	0	0	0	0	0	1	0	0	1	1											0	0	0	0	0	0	0	1
20191106	3	0	0	0	0	0	0	0	1	0	0	1	1											0	0	0	0	0	0	0	1
20191106	4	0	0	0	0	0	0	0	1	0	0	1	1	0	0	0	0	0	0	0	0	0	0	0	0	1	0	0	0	1	0
20191106	5	0	0	0	0	0	0	0	1	0	0	1	2
20191106	6	0	0	0	0	0	0	0	1	0	0	1	2
20191106	7	0	0	0	0	0	0	0	1	0	0	1	2
20191106	8	0	0	0	0	0	0	0	1	0	0	1	2
20191106	9	1	0	0	0	0	0	1	1	0	0	1	2
20191106	10	0	0	0	0	0	0	0	0	1	0	2	2
20191111	1	0	0	0	0	0	0	0	0	1	0	2	1	0	0	0	0	1	0	0	1	0	0	0	0	1	0	0	0	1	0
20191111	2	0	0	0	0	0	0	0	0	1	0	2	1	0	0	0	0	0	0	0	1	0	0	0	0	1	0	0	0	1	0
20191111	3	0	0	0	0	0	0	0	0	1	0	2	1	0	0	0	0	1	0	0	0	0	0	0	0	1	0	0	0	1	0
20191111	4	1	0	0	0	0	0	1	1	0	0	1	2
20191113	1	0	0	0	0	0	0	0	0	1	0	2	1	0	0	0	0	0	0	0	0	0	1	0	0	0	0	1	0	0	1
20191113	2	1	0	0	0	0	0	1	1	0	0	1	2
20191114	1	0	0	0	0	0	0	0	0	1	0	2	1											0	0	0	0	0	0	0	1
20191114	2	0	0	0	0	0	0	0	1	0	0	1	2
20191115	1	0	0	0	0	0	0	0	0	1	0	2	1	0	0	0	1	1	0	0	0	0	0	0	0	1	0	0	1	1	0
20191123	1	1	0	0	0	0	0	1	1	0	0	1	1	0	1	0	0	0	1	0	0	0	0	0	0	1	1	0	0	1	4
20191123	2	0	0	0	0	0	0	0	0	0	1	3	1	0	0	0	1	0	0	0	0	0	0	0	0	1	1	0	0	1	0
20191126	1	1	0	0	0	0	0	1	0	1	0	2	1	0	0	0	0	0	1	0	0	0	0	0	0	0	0	0	0	0	1
20191126	2	0	0	0	0	0	0	0	0	1	0	2	1	0	0	0	0	1	0	0	0	0	0	0	0	1	0	0	0	1	0
20191126	3	0	0	0	0	0	0	0	0	1	0	2	1											0	0	0	0	0	1	0	0
20191126	4	0	0	0	0	0	0	0	0	1	0	2	1	0	0	0	1	0	0	0	0	0	0	0	0	1	1	0	0	1	0
20191126	5	0	0	0	0	0	0	0	0	1	0	2	2
20191126	6	0	0	0	0	1	0	5	1	0	0	1	2
20191126	7	0	0	0	0	0	0	0	1	0	0	1	2
20191201	1	1	0	0	0	0	0	1	0	1	0	2	1	0	0	0	1	0	0	0	0	0	0	0	0	1	0	0	0	0	0
20191203	1	1	0	0	0	0	0	1	0	1	0	2	1	0	0	0	0	1	0	0	0	0	0	0	0	1	0	0	0	1	0
20191205	1	0	0	0	0	0	0	0	1	0	0	1	1											0	0	0	0	0	0	0	1
20191205	2	1	0	0	0	0	0	1	1	0	0	1	1	0	0	0	0	0	1	0	0	0	0	0	0	0	0	0	0	1	0
20191205	3	0	0	0	0	0	0	0	0	1	0	2	1	0	0	0	0	0	0	0	0	0	0	0	0	0	0	0	0	1	0
20191205	4	0	0	1	0	0	0	3	1	0	0	1	1											0	0	0	0	0	0	0	1
20191207	1	0	0	0	0	0	0	0	1	0	0	1	1	1	0	0	0	0	0	0	0	0	0	1	0	0	0	0	0	0	0
20191207	2	0	0	0	0	1	0	5	1	0	0	1	2
20191207	3	0	0	0	0	0	0	0	0	1	0	2	2
20191208	1	0	0	0	0	0	0	0	0	1	0	2	1	0	0	0	1	0	0	0	0	0	0	0	0	0	1	0	0	1	0
20191208	2	0	1	0	0	0	0	2	0	1	0	2	2
20191208	3	0	0	1	0	0	0	3	0	1	0	2	2
20191208	4	0	0	0	0	0	0	0	0	1	0	2	2
20191208	5	0	0	1	0	0	0	3	1	0	0	1	2
20191208	6	0	0	1	0	0	0	3	1	0	0	1	2
20191208	7	0	0	1	0	0	0	3	1	0	0	1	2
20191208	8	0	0	1	0	0	0	3	1	0	0	1	2
20191217/2	1	0	0	0	0	0	0	0	1	0	0	1	1	0	0	0	1	0	0	0	0	0	0	0	0	0	0	0	0	1	1
20191217/2	2	0	0	0	0	0	0	0	0	1	0	2	1	0	0	0	0	1	0	0	0	0	0	0	0	1	0	0	0	1	0
20191217/2	3	0	0	0	0	0	0	0	1	0	0	1	1	0	0	0	1	0	0	0	0	0	0	0	0	1	1	0	0	1	0
20191217/2	4	0	0	0	0	0	0	0	1	0	0	1	1	0	0	0	1	0	0	0	0	0	0	1	0	0	0	0	0	0	1
20191217/2	5	0	0	0	0	0	0	0	1	0	0	1	1	0	0	0	0	0	0	0	0	0	0	0	0	1	1	0	0	1	0
20191217/2	6	0	0	0	0	0	0	0	0	1	0	2	1	0	0	0	0	0	0	0	0	0	0	0	0	0	1	0	0	1	2
20191217/2	7	0	0	1	0	0	0	3	1	0	0	1	2
20191217/2	8	0	0	0	0	0	0	0	1	0	0	1	2
20191217/2	9	0	0	0	0	0	0	0	1	0	0	1	2
20191217/2	10	0	0	1	0	0	0	3	1	0	0	1	2
20191217/2	11	0	1	0	0	0	0	2	1	0	0	1	2
20191217/2	12	0	0	0	0	0	0	0	1	0	0	1	2
20191217/2	13	0	0	0	0	0	0	0	1	0	0	1	2
20191217/2	14	0	0	0	0	0	0	0	1	0	0	1	2
20191217/2	15	0	0	0	0	0	0	0	1	0	0	1	2
20191217/2	16	0	0	0	0	0	0	0	0	1	0	2	2
20191217/2	17	0	0	0	0	0	0	0	1	0	0	1	2
20191217/2	18	0	0	0	0	0	0	0	1	0	0	1	2
20191217/2	19	0	0	1	0	0	0	3	1	0	0	1	2
20191217/2	20	0	0	0	0	0	0	0	1	0	0	1	2
20191217/2	21	0	0	1	0	0	0	3	1	0	0	1	2
20191217/2	22	0	0	0	0	0	0	0	0	1	0	2	2
20191217/2	23	0	0	1	0	0	0	3	1	0	0	1	2
20191217/2	24	0	0	0	0	0	0	0	0	1	0	2	2
20191228	1	1	0	0	0	0	0	1	0	1	0	2	1	0	0	0	0	0	1	0	0	0	0	0	0	0	1	0	0	1	0
20191228	2	0	0	0	0	0	0	0	0	1	0	2	1	0	0	0	0	0	0	0	0	0	1	0	0	0	0	0	0	1	0
20191228	3	0	0	0	0	0	0	0	0	1	0	2	1	0	0	0	0	0	0	0	0	0	1	0	0	0	0	0	0	1	0
20191228	4	0	0	0	0	0	0	0	0	1	0	2	1	0	0	0	0	0	0	0	0	0	1	0	0	0	0	0	0	1	0
20191228	5	0	0	0	0	0	0	0	1	0	0	1	2
20191228	6	1	0	0	0	0	0	1	0	1	0	2	2
20191229	1	0	0	0	0	0	0	0	1	0	0	1	1	0	0	0	1	0	0	0	0	0	1	0	1	0	0	1	0	1	1
20191229	2	0	0	0	0	0	0	0	1	0	0	1	1	1	0	0	0	0	0	0	0	0	0	1	0	0	0	0	0	0	1
20191229	3	0	0	0	0	0	0	0	0	1	0	2	1											0	0	0	0	0	0	0	1
20191229	4	0	0	0	0	0	0	0	1	0	0	1	1											0	0	0	0	0	0	0	1
20191229	5	0	0	0	0	0	0	0	1	0	0	1	1											0	0	0	0	0	0	0	1
20191229	6	0	0	0	0	0	0	0	0	1	0	2	2
20191229	7	0	0	0	0	0	0	0	1	0	0	1	2
20191229	8	0	0	0	0	0	0	0	1	0	0	1	2
20191229	9	0	0	0	0	0	0	0	0	1	0	2	2
20191229	10	0	0	0	0	0	0	0	1	0	0	1	2
20191229	11	0	0	0	0	0	0	0	1	0	0	1	2
20191229	12	0	0	0	0	0	0	0	1	0	0	1	2
20191229	13	0	0	0	0	0	0	0	0	1	0	2	2
20191229	14	0	0	0	0	0	0	0	1	0	0	1	2
20191229	15	0	0	0	0	0	0	0	1	0	0	1	2
20191229	16	0	0	0	0	0	0	0	1	0	0	1	2
20191229	17	0	0	1	0	0	0	3	1	0	0	1	2
20191229	18	0	0	0	0	0	0	0	0	1	0	2	2
20191229	19	0	0	0	0	0	0	0	1	0	0	1	2
20200101	1	0	0	0	0	0	0	0	1	0	0	1	1	0	0	0	0	0	1	0	0	0	0	1	0	0	0	0	0	1	3
20200101	2	0	0	0	0	0	0	0	0	1	0	2	1	0	0	0	1	0	0	0	0	0	0	0	0	0	1	0	0	1	0
20200101	3	0	0	0	0	0	0	0	1	0	0	1	1	0	0	0	1	0	0	0	0	0	0	0	1	1	0	0	0	1	0
20200101	4	0	0	0	0	0	0	0	0	1	0	2	1	0	0	0	0	1	0	0	0	0	1	0	0	1	0	0	0	1	0
20200101	5	0	0	0	0	0	0	0	0	1	0	2	2
20200101	6	0	1	0	0	0	0	2	1	0	0	1	2
20200106	1	0	0	0	0	0	0	0	0	1	0	2	1	0	0	0	0	0	0	0	0	0	0	0	0	1	0	0	0	1	0
20200106	2	1	0	0	0	0	0	1	0	1	0	2	2
20200106	2	0	0	0	1	0	0	4	0	1	0	2	2
20200106	3	0	0	0	1	0	0	4	0	1	0	2	2
20200106	4	0	0	0	0	0	0	0	0	1	0	2	2
20200118	1	0	0	0	0	0	0	0	1	0	0	1	1											0	0	0	0	0	0	0	1
20200118	2	0	0	0	0	0	0	0	1	0	0	1	2
20200120	1	0	0	0	0	0	0	0	1	0	0	1	1	0	0	0	1	0	0	0	0	0	0	1	0	0	0	0	0	0	1
20200120	2	0	0	0	0	0	0	0	1	0	0	1	1											0	0	0	0	0	0	0	1
20200120	3	0	0	0	0	0	0	0	1	0	0	1	1											0	0	0	0	0	0	0	1
20200120	4	0	0	0	0	0	0	0	1	0	0	1	2
20200120	5	0	0	0	0	0	0	0	0	1	0	2	2
20200121	1	0	0	0	0	0	0	0	1	0	0	1	1											0	0	0	0	0	0	0	1
20200121	2	0	0	1	0	0	0	3	1	0	0	1	1											0	0	0	0	0	0	0	1
20200121	3	1	0	0	0	0	0	1	0	1	0	2	2
20200121	4	0	0	0	0	0	0	0	1	0	0	1	2
20200121	5	0	0	0	0	0	0	0	1	0	0	1	2
20200121	6	0	0	0	0	0	0	0	0	1	0	2	2
20200121	7	0	0	0	0	0	1	6	0	1	0	2	2
20200121	8	0	0	0	0	0	0	0	0	1	0	2	2
20200121	9	0	0	0	0	0	0	0	0	1	0	2	2
20200121	10	1	0	0	0	0	0	1	1	0	0	1	2
20200121	11	0	0	0	0	0	0	0	1	0	0	1	2
20200121	12	0	0	0	0	0	0	0	0	1	0	2	2
20200121	13	0	0	0	0	0	0	0	0	1	0	2	2
20200121	14	0	0	0	0	0	0	0	1	0	0	1	2
20200121	15	1	0	0	0	0	0	1	1	0	0	1	2
20200121	16	1	0	0	0	0	0	1	0	1	0	2	2
20200121	17	0	0	0	0	0	0	0	1	0	0	1	2
20200121	18	1	0	0	0	0	0	1	0	1	0	2	2
20200121	19	0	0	0	0	0	0	0	0	1	0	2	2
20200123	1	0	0	0	0	0	0	0	1	0	0	1	1											0	0	0	0	0	0	0	1
20200123	2	0	0	0	0	0	0	0	0	1	0	2	1	0	0	0	0	0	1	0	0	0	0	0	1	1	0	1	0	1	2
20200123	3	0	0	0	0	0	0	0	1	0	0	1	1											0	0	0	0	0	0	0	1
20200123	4	0	0	0	0	0	0	0	1	0	0	1	1											0	0	0	0	0	0	0	1
20200123	5	0	0	0	0	0	0	0	1	0	0	1	1											0	0	0	0	0	0	1	0
20200123	6	0	0	0	0	0	0	0	1	0	0	1	2
20200123	7	0	0	0	0	0	0	0	0	1	0	2	2
20200123	8	0	0	0	0	0	0	0	1	0	0	1	2
20200123	9	0	0	0	0	0	0	0	1	0	0	1	2
20200123	10	0	0	0	0	0	0	0	0	1	0	2	2
20200123	11	0	0	0	0	0	0	0	1	0	0	1	2
20200123	12	0	0	0	0	0	0	0	0	1	0	2	2
20200123	13	0	0	0	0	0	0	0	0	1	0	2	2
20200123	14	0	0	0	0	0	0	0	0	1	0	2	2
20200123	15	0	1	0	0	0	0	2	0	1	0	2	2
20200123	16	0	1	0	0	0	0	2	1	0	0	1	2
20200123	17	0	0	0	0	0	0	0	1	0	0	1	2
20200123	18	0	0	0	0	0	0	0	1	0	0	1	2
20200123	19	0	0	0	0	0	0	0	0	1	0	2	2
20200123	20	0	0	0	0	0	0	0	1	0	0	1	2
20200123	21	0	0	0	0	0	0	0	0	1	0	2	2
20200125	1	0	0	0	0	0	0	0	1	0	0	1	1											0	0	0	0	0	0	0	1
20200125	2	0	0	0	0	0	0	0	1	0	0	1	1	1	0	0	0	0	0	0	1	0	0	0	0	0	1	0	0	1	0
20200125	3	0	0	0	0	0	0	0	1	0	0	1	2
20200125	4	1	0	0	0	0	0	1	0	1	0	2	2
20200202	1	0	0	0	0	0	0	0	1	0	0	1	1	0	0	0	0	0	0	0	0	0	0	0	0	0	0	0	0	1	0
20200202	2	0	0	0	0	0	0	0	1	0	0	1	2
20200202	3	0	0	0	0	0	0	0	1	0	0	1	2
20200202	4	0	0	0	0	0	0	0	1	0	0	1	2
20200202	5	0	0	0	0	0	0	0	1	0	0	1	2
20200202	6	0	0	0	0	0	0	0	1	0	0	1	2
20200202	7	0	0	0	0	0	0	0	0	1	0	2	2
20200202	8	0	0	0	0	0	0	0	1	0	0	1	2
20200202	9	0	0	0	0	0	0	0	0	1	0	2	2
20200205	1	0	0	0	0	0	0	0	1	0	0	1	1	0	0	0	0	0	0	0	0	0	0	0	0	0	0	0	0	1	0
20200205	2	0	0	0	0	0	0	0	1	0	0	1	2
20200205	3	1	0	0	0	0	0	1	0	1	0	2	2
20200205	4	0	0	0	0	0	0	0	1	0	0	1	2
20200205	5	0	0	0	0	0	0	0	0	1	0	2	2
20200205	6	0	0	0	0	0	0	0	0	1	0	2	2
20200211	1	0	0	1	0	0	0	3	1	0	0	1	1											0	0	0	0	0	0	0	1
20200211	2	0	0	0	0	0	0	0	1	0	0	1	2
20200211	3	0	0	0	0	0	0	0	0	1	0	2	2
20200211	4	0	0	0	0	0	0	0	1	0	0	1	2
20200219	1	0	0	0	0	0	0	0	1	0	0	1	1	0	0	0	0	0	1	0	0	0	1	0	0	1	1	0	1	1	0
20200219	2	0	0	0	0	0	0	0	1	0	0	1	1	1	0	0	0	0	0	0	0	0	0	0	0	0	0	0	0	0	1
20200219	3	0	0	0	0	0	0	0	1	0	0	1	1	0	0	0	0	0	1	0	0	0	0	0	0	0	0	0	0	1	0
20200219	4	0	0	0	0	0	0	0	1	0	0	1	1											0	0	0	0	0	0	0	1
20200219	5	0	0	0	0	0	0	0	1	0	0	1	2
20200219	6	0	0	1	0	0	0	3	0	1	0	2	2
20200219	7	0	0	0	0	0	0	0	1	0	0	1	2
20200219	8	0	0	0	0	0	0	0	1	0	0	1	2
20200219	9	0	0	0	0	0	0	0	0	1	0	2	2
20200219	10	0	0	0	0	0	0	0	1	0	0	1	2
20200306	1	0	0	0	0	0	0	0	1	0	0	1	1	1	0	0	0	0	0	0	0	0	0	0	0	0	1	0	0	0	0
20200306	2	0	0	0	0	0	0	0	1	0	0	1	1	1	0	0	0	0	0	0	0	0	0	0	0	0	1	0	0	0	1
20200306	3	0	1	0	0	0	0	2	0	1	0	2	1	0	0	0	0	0	0	0	0	0	0	0	1	1	0	0	0	1	0
20200306	4	0	0	0	0	0	0	0	1	0	0	1	2
20200306	5	0	0	0	0	0	0	0	0	0	1	3	2
20200306	6	0	0	0	0	0	0	0	0	1	0	2	2
20200306	7	0	0	0	0	0	0	0	1	0	0	1	2
20200306	8	1	0	0	0	0	0	1	0	1	0	2	2
20200306	9	1	0	0	0	0	0	1	0	1	0	2	2
20200306	10	0	0	0	0	0	0	0	1	0	0	1	2
20200311/1	1	0	0	0	0	0	0	0	1	0	0	1	1	0	0	0	1	0	0	0	0	0	0	1	0	0	0	0	0	0	1
20200311/1	2	0	0	0	0	0	0	0	0	1	0	2	2
20200311/1	3	0	0	0	0	0	0	0	0	1	0	2	2
20200311/1	4	0	0	0	0	0	0	0	1	0	0	1	2
20200311/1	5	0	0	0	0	0	0	0	1	0	0	1	2
20200311/1	6	0	0	0	0	0	0	0	1	0	0	1	2
20200311/1	7	0	0	0	0	0	0	0	1	0	0	1	2
20200311/1	8	0	0	0	0	0	0	0	1	0	0	1	2
20200311/1	9	0	0	0	0	0	0	0	1	0	0	1	2
20200311/1	10	0	0	0	0	0	0	0	1	0	0	1	2
20200311/1	11	0	0	0	0	0	0	0	1	0	0	1	2
20200311/1	12	0	0	0	0	0	0	0	0	1	0	2	2
20200315	1	0	0	0	0	0	0	0	1	0	0	1	1	0	0	0	0	0	0	0	0	0	1	0	0	0	0	1	0	1	0
20200315	2	0	0	0	0	0	0	0	1	0	0	1	2
20200328	1	0	1	0	0	0	0	2	0	1	0	2	1	0	0	0	0	0	1	0	0	0	0	0	0	1	0	1	0	1	0
20200328	2	0	0	0	0	0	0	0	1	0	0	1	1											0	0	0	0	0	0	0	1
20200328	3	0	1	0	0	0	0	2	0	1	0	2	1	0	0	0	1	0	0	0	0	0	0	0	0	1	0	1	0	1	0
20200328	4	0	0	0	0	0	0	0	1	0	0	1	2
20200331	1	1	0	0	0	0	0	1	0	1	0	2	1	0	0	0	0	0	0	0	0	0	0	0	0	0	0	0	0	1	0
20200331	2	1	0	0	0	0	0	1	1	0	0	1	2
20200406/1	1	0	0	0	0	0	0	0	1	0	0	1	1	0	0	0	0	0	0	0	0	0	0	0	0	0	0	0	0	1	1
20200406/1	2	0	0	0	0	0	0	0	1	0	0	1	1											0	0	0	0	0	0	0	1
20200406/1	3	0	0	0	0	0	0	0	0	0	1	3	1	0	0	0	0	0	0	0	0	1	0	0	0	0	0	0	0	1	0
20200406/1	4	0	0	0	0	0	0	0	1	0	0	1	1	0	0	0	0	0	0	0	1	0	0	0	0	0	0	0	0	1	0
20200406/1	5	0	0	0	0	0	0	0	1	0	0	1	1	0	0	0	0	0	1	0	0	0	0	0	1	0	0	0	1	1	1
20200406/1	6	0	0	0	0	0	0	0	1	0	0	1	1											0	0	0	0	0	0	0	1
20200406/1	7	0	0	0	0	0	0	0	1	0	0	1	1	0	0	0	0	0	0	0	0	0	0	0	0	0	0	0	0	1	0
20200406/1	8	0	0	0	0	0	0	0	1	0	0	1	1											0	0	0	0	0	0	0	1
20200406/1	9	0	0	0	0	0	0	0	1	0	0	1	2
20200406/1	10	0	0	0	0	0	0	0	1	0	0	1	2
20200406/1	11	0	0	0	0	0	0	0	1	0	0	1	2
20200415/2	1	0	0	0	0	0	0	0	1	0	0	1	1											0	0	0	0	0	0	0	1
20200415/2	2	0	0	1	0	0	0	3	0	1	0	2	2
20200415/2	3	1	0	0	0	0	0	1	0	1	0	2	2
20200417/2	1	0	0	0	0	0	0	0	1	0	0	1	1											0	0	0	0	0	0	0	1
20200417/2	2	0	0	0	1	0	0	4	0	1	0	2	1	0	0	0	0	0	0	0	0	0	0	0	0	1	0	0	0	1	0
20200417/2	3	1	0	0	0	0	0	1	0	1	0	2	2
20200417/2	4	0	0	0	0	0	0	0	1	0	0	1	2
20200417/2	5	0	0	0	1	0	0	4	0	1	0	2	2
20200417/2	6	0	0	0	0	0	0	0	0	0	1	3	2
20200417/2	7	0	0	0	0	0	0	0	1	0	0	1	2
20200421/1	1	0	0	0	0	0	0	0	1	0	0	1	1											0	0	0	0	0	0	0	1
20200421/1	2	0	0	0	0	0	0	0	1	0	0	1	2
20200421/1	3	0	0	0	0	0	0	0	1	0	0	1	2
20200421/1	4	0	0	0	0	0	0	0	1	0	0	1	2
20200421/1	5	0	0	1	0	0	0	3	0	1	0	2	2
20200421/1	6	0	0	0	0	0	0	0	0	1	0	2	2
20200421/1	7	0	0	0	0	0	0	0	0	1	0	2	2
20200421/1	8	0	0	0	0	0	0	0	1	0	0	1	2
20200421/1	9	0	0	0	0	0	0	0	0	1	0	2	2
20200421/1	10	0	0	0	0	0	0	0	1	0	0	1	2
20200421/1	11	0	0	0	0	0	0	0	1	0	0	1	2
20200421/1	12	0	0	0	0	0	0	0	1	0	0	1	2
20200421/1	13	0	0	0	0	0	0	0	0	1	0	2	2
20200421/1	14	0	0	0	0	0	0	0	1	0	0	1	2
20200421/1	15	0	0	0	0	0	0	0	1	0	0	1	2
20200425	1	0	0	0	0	0	0	0	1	0	0	1	1	0	0	0	1	0	0	0	0	0	0	0	0	0	0	1	0	1	0
20200425	2	0	0	0	0	0	0	0	1	0	0	1	1	0	0	0	1	0	0	0	0	0	0	0	0	0	1	0	0	1	0
20200425	3	0	0	0	0	0	0	0	0	1	0	2	1											0	0	0	0	0	0	0	1
20200425	4	0	0	0	0	0	0	0	1	0	0	1	1	0	0	0	1	0	0	0	0	0	0	1	0	0	0	0	0	1	0
20200425	5	0	0	0	0	0	0	0	1	0	0	1	1	0	0	0	0	0	1	0	0	0	0	0	0	0	0	1	0	1	1
20200425	6	0	0	1	0	0	0	3	0	1	0	2	1	0	0	0	1	0	0	0	0	0	0	0	0	0	1	0	0	1	0
20200425	7	0	0	0	0	0	0	0	0	1	0	2	1	0	0	0	1	0	0	0	0	0	0	0	0	0	0	1	0	1	0
20200425	8	0	0	0	0	0	0	0	1	0	0	1	2
20200425	9	0	0	0	0	0	0	0	0	1	0	2	2
20200425	10	0	0	0	0	0	0	0	1	0	0	1	2
20200425	11	0	0	0	0	0	0	0	0	1	0	2	2
20200428	1	0	0	0	0	0	0	0	1	0	0	1	1											0	0	0	0	0	0	0	1
20200430	1	0	0	1	0	0	0	3	0	1	0	2	1	0	0	0	0	0	0	0	0	0	0	0	0	0	0	0	0	1	2
20200430	2	0	0	0	0	0	0	0	0	1	0	2	1	0	0	0	0	0	0	0	0	0	0	0	0	0	0	0	0	1	0
20200430	3	0	0	0	0	0	0	0	1	0	0	1	1	0	0	0	1	0	0	0	0	0	0	1	0	0	0	0	0	0	0
20200430	4	0	0	0	0	0	0	0	1	0	0	1	1	0	0	0	0	0	1	0	0	0	0	0	1	0	0	0	1	0	0
20200430	5	0	0	0	0	0	0	0	0	1	0	2	1	0	0	0	0	0	0	0	0	0	0	0	0	0	0	0	0	1	0
20200430	6	0	0	0	0	0	0	0	1	0	0	1	1	0	0	0	0	0	0	0	0	0	0	0	0	0	0	0	0	1	0
20200430	7	0	0	0	0	0	0	0	1	0	0	1	2
20200430	8	0	0	0	0	0	0	0	1	0	0	1	2
20200430	9	0	0	0	0	0	0	0	0	1	0	2	2
20200430	10	0	0	0	0	0	0	0	1	0	0	1	2
20200430	11	0	0	0	0	0	0	0	0	1	0	2	2
20200430	12	0	0	0	0	0	0	0	1	0	0	1	2
20200430	13	0	0	0	0	0	0	0	0	1	0	2	2
20200430	14	0	0	0	0	0	0	0	1	0	0	1	2
20200430	15	0	0	0	0	0	0	0	1	0	0	1	2
20200503/2	1	0	0	0	0	0	0	0	1	0	0	1	1											0	0	0	0	0	0	0	1
20200506	1	0	1	0	0	0	0	2	0	1	0	2	1	0	0	0	1	1	0	0	1	0	0	0	1	1	0	0	0	1	2
20200506	2	1	0	0	0	0	0	1	0	1	0	2	1	0	0	0	0	1	1	0	0	0	0	1	0	1	0	0	0	1	0
20200506	3	1	0	0	0	0	0	1	0	1	0	2	1	0	0	0	0	1	0	0	0	0	0	0	0	1	0	0	0	1	1
20200506	4	1	0	0	0	0	0	1	0	1	0	2	2
20200506	5	0	0	1	0	0	0	3	1	0	0	1	2
20200510	1	0	0	0	0	0	0	0	0	1	0	2	1	0	0	0	0	0	0	0	0	0	0	0	0	1	0	0	0	0	0
20200513	1	0	0	0	0	0	0	0	1	0	0	1	1	0	0	0	0	0	0	0	0	0	0	0	0	0	0	0	0	1	0
20200513	2	0	0	0	0	0	0	0	1	0	0	1	2
20200513	3	0	0	0	0	0	0	0	1	0	0	1	1											0	0	0	0	0	0	0	1
20200513	4	0	0	0	0	0	0	0	1	0	0	1	2
20200513	5	0	0	0	0	0	0	0	1	0	0	1	2
20200513	6	0	0	0	0	0	0	0	1	0	0	1	2
20200519	1	0	0	0	0	0	0	0	0	1	0	2	1	0	0	0	0	0	0	0	0	0	1	0	0	1	0	0	0	1	2
20200519	2	0	0	0	0	0	0	0	1	0	0	1	2
20200519	3	0	0	0	0	0	0	0	0	1	0	2	2
20200521	1	0	0	0	0	0	0	0	0	1	0	2	1	0	0	0	1	1	0	0	0	0	0	0	1	1	0	0	0	1	0
20200521	2	0	0	0	0	0	0	0	0	1	0	2	1	0	0	0	0	1	0	0	1	0	0	0	0	1	0	0	0	1	0
20200521	3	0	0	0	0	0	0	0	0	1	0	2	1	0	0	0	0	1	1	0	0	0	0	0	1	1	0	0	0	1	0
20200521	4	0	0	0	0	0	0	0	0	1	0	2	1	0	1	0	0	1	0	0	0	0	0	0	0	1	1	0	0	1	0
20200521	5	0	0	0	0	0	0	0	0	1	0	2	1	0	0	0	0	1	0	0	0	0	0	0	0	1	1	0	0	1	1
20200521	6	0	0	0	0	0	0	0	0	1	0	2	2
20200521	7	0	0	0	0	0	0	0	0	1	0	2	2
20200521	8	0	0	0	0	0	0	0	1	0	0	1	2
20200521	9	0	0	0	0	0	0	0	1	0	0	1	2
20200521	10	1	0	0	0	0	0	1	0	1	0	2	2
20200521	11	0	0	0	0	0	0	0	1	0	0	1	2
20200521	12	0	0	0	0	0	0	0	0	1	0	2	2
20200525	1	0	0	0	0	0	0	0	1	0	0	1	1											0	0	0	0	0	0	0	1
20200525	2	0	0	0	0	0	0	0	1	0	0	1	2
20200525	3	0	0	0	0	0	0	0	0	1	0	2	2
20200525	4	0	0	0	0	0	0	0	1	0	0	1	2
20200525	5	0	0	1	0	0	0	3	1	0	0	1	2
20200525	6	0	0	0	0	0	0	0	0	1	0	2	2
20200525	7	0	0	0	0	0	0	0	1	0	0	1	2
20200528	1	0	0	0	0	0	0	0	1	0	0	1	1	0	0	0	0	0	0	0	0	0	0	0	0	0	0	0	0	1	1
20200528	2	0	0	0	0	0	0	0	0	1	0	2	1											0	0	0	0	0	0	0	1
20200528	3	0	0	1	0	0	0	3	1	0	0	1	1											0	0	0	0	0	0	0	1
20200528	4	0	0	0	0	0	0	0	1	0	0	1	1											0	0	0	0	0	0	0	1
20200528	5	0	0	0	0	0	0	0	1	0	0	1	1	1	0	0	0	0	0	0	0	0	0	0	0	1	0	0	0	0	0
20200528	6	0	0	0	0	0	0	0	0	1	0	2	2
20200531/1	1	0	0	0	0	0	0	0	1	0	0	1	1											0	0	0	0	0	0	0	1
20200531/1	2	0	0	1	0	0	0	3	0	1	0	2	2
20200531/1	3	0	0	0	0	0	0	0	1	0	0	1	2
20200531/1	4	0	0	0	0	0	0	0	1	0	0	1	2
20200531/1	5	0	0	0	0	0	0	0	1	0	0	1	2
20200531/1	6	0	0	0	0	0	0	0	1	0	0	1	2
20200531/1	7	0	0	0	0	0	0	0	1	0	0	1	2
20200531/1	8	0	0	1	0	0	0	3	1	0	0	1	2
20200531/2	1	1	0	0	0	0	0	1	1	0	0	1	1	0	0	0	0	0	0	0	0	0	0	0	0	0	0	0	0	1	0
20200601	1	0	0	0	0	0	0	0	1	0	0	1	1											0	0	0	0	0	0	0	1
20200601	2	0	0	0	0	0	0	0	0	1	0	2	1	0	0	0	0	0	0	0	0	0	0	0	0	1	0	0	0	0	0
20200601	3	0	0	0	0	0	0	0	1	0	0	1	1	0	0	0	0	0	0	0	0	0	0	0	0	1	0	0	0	0	0
20200601	4	0	0	0	0	0	0	0	1	0	0	1	1	0	0	0	1	0	0	0	0	0	0	0	0	1	0	0	0	0	0
20200601	5	0	0	0	0	0	0	0	1	0	0	1	1	1	0	0	0	1	0	0	0	0	0	1	0	1	1	0	0	0	2
20200601	6	0	0	0	0	0	0	0	1	0	0	1	1	0	1	0	1	0	1	0	0	0	0	0	0	1	1	0	0	1	2
20200601	7	0	0	0	0	0	0	0	1	0	0	1	2
20200601	8	0	0	0	0	0	0	0	1	0	0	1	2
20200601	9	0	0	0	0	0	0	0	1	0	0	1	2
20200601	10	0	0	0	0	0	0	0	1	0	0	1	2
20200601	11	0	0	0	0	0	0	0	1	0	0	1	2
20200602/1	1	1	0	0	0	0	0	1	0	1	0	2	1											0	0	0	0	0	0	0	1
20200602/1	2	0	0	0	0	0	0	0	1	0	0	1	1	0	0	0	0	0	1	0	0	0	0	0	0	0	0	0	0	1	0
20200602/1	3	0	0	0	0	0	0	0	1	0	0	1	1											0	0	0	0	0	0	0	1
20200602/1	4	0	0	0	0	0	0	0	0	1	0	2	1	0	0	0	1	1	0	0	0	0	0	0	0	1	1	1	0	1	0
20200603	1	0	0	0	0	0	0	0	0	1	0	2	1	0	0	0	0	0	0	0	1	0	0	1	0	0	1	0	0	0	2
20200603	2	0	0	0	0	0	0	0	0	0	1	3	1											0	0	0	0	0	0	0	1
20200603	3	0	0	0	0	0	0	0	0	1	0	2	1											0	0	0	0	0	0	1	0
20200603	4	0	0	0	0	0	0	0	1	0	0	1	1	0	0	0	0	0	0	0	1	0	0	0	0	0	0	0	0	1	0
20200603	5	0	0	0	0	0	0	0	1	0	0	1	1	1	0	0	0	0	0	0	0	0	0	0	0	0	0	0	0	1	0
20200609	1	0	0	1	0	0	0	3	1	0	0	1	1											0	0	0	0	0	0	0	1
20200616	1	1	0	0	0	0	0	1	1	0	0	1	1											0	0	0	0	0	0	0	1
20200616	2	0	0	0	0	0	0	0	0	1	0	2	2
20200616	3	0	0	0	0	0	0	0	0	1	0	2	2
20200616	4	0	0	0	0	0	0	0	1	0	0	1	2
20200619	1	0	0	0	0	0	0	0	0	1	0	2	1	0	0	0	1	0	1	0	0	0	0	0	0	1	1	0	0	1	0
20200619	2	0	0	0	0	0	0	0	1	0	0	1	1	0	0	0	0	0	1	0	0	0	0	0	1	0	0	0	0	1	0
20200619	3	0	0	0	0	0	0	0	0	1	0	2	1	0	0	0	0	0	0	0	0	0	1	0	0	0	1	0	0	1	0
20200619	4	1	0	0	0	0	0	1	0	1	0	2	2
20200621/2	1	0	1	0	0	0	0	2	0	1	0	2	1	0	0	0	1	0	1	0	0	0	0	0	0	1	1	1	0	1	1
20200621/2	2	0	0	0	0	0	0	0	1	0	0	1	1											0	0	0	0	0	0	0	2
20200621/2	3	0	0	0	0	0	0	0	1	0	0	1	2
20200621/2	4	0	0	0	0	0	0	0	1	0	0	1	2
20200621/2	5	1	0	0	0	0	0	1	0	1	0	2	2
20200621/2	6	0	0	0	0	0	0	0	1	0	0	1	2
20200621/2	7	0	0	0	0	0	0	0	1	0	0	1	2
20200625/1	1	0	0	0	0	0	0	0	0	1	0	2	1	0	0	0	0	0	0	0	0	0	1	1	0	1	0	0	0	0	1
20200625/1	2	0	0	0	0	0	0	0	1	0	0	1	1	0	0	0	0	0	0	0	0	0	1	0	0	0	0	0	0	1	0
20200625/1	3	0	0	0	0	0	0	0	1	0	0	1	1	0	0	0	1	0	0	0	0	0	0	0	0	0	1	0	0	0	0
20200625/1	4	0	0	0	0	0	0	0	1	0	0	1	1											0	0	0	0	0	0	0	1
20200625/1	5	0	0	0	0	0	0	0	1	0	0	1	1											0	0	0	0	0	0	0	1
20200625/1	6	0	0	0	0	0	0	0	1	0	0	1	1	0	0	0	0	0	0	0	0	0	1	0	0	0	0	0	0	1	0
20200625/1	7	0	0	0	0	0	0	0	1	0	0	1	1											0	0	0	0	0	0	0	1
20200625/1	8	0	0	0	0	0	0	0	1	0	0	1	1	0	0	0	0	0	0	0	0	0	1	0	0	0	0	0	0	1	0
20200625/1	9	0	0	0	0	0	0	0	0	1	0	2	1											0	0	0	0	0	0	0	1
20200625/1	10	0	0	0	0	0	0	0	1	0	0	1	2
20200625/1	11	0	0	0	0	0	0	0	1	0	0	1	2
20200625/1	12	0	0	0	0	0	0	0	1	0	0	1	2
20200625/1	13	0	0	0	0	0	0	0	1	0	0	1	2
20200625/1	14	0	0	0	0	0	0	0	1	0	0	1	2
20200625/1	15	0	0	0	0	0	0	0	0	1	0	2	2
20200625/1	16	0	0	0	0	0	0	0	1	0	0	1	2
20200625/1	17	0	0	0	0	0	0	0	1	0	0	1	2
20200625/1	18	0	0	0	0	0	0	0	1	0	0	1	2
20200626	1	1	0	0	0	0	0	1	0	1	0	2	1	0	0	0	0	0	0	0	0	0	0	0	0	1	0	0	0	1	0
20200626	2	0	0	0	0	0	0	0	0	0	1	3	2
20200626	3	0	0	0	0	0	0	0	1	0	0	1	2
20200626	4	0	0	0	0	0	0	0	1	0	0	1	2
20200627	1	0	0	0	0	0	0	0	1	0	0	1	1	0	0	0	0	0	0	0	0	0	0	0	0	0	0	0	0	1	0
20200627	2	1	0	0	0	0	0	1	1	0	0	1	1	0	0	0	0	0	1	0	0	0	0	0	0	0	0	0	0	1	0
20200627	3	0	0	1	0	0	0	3	1	0	0	1	2
20200701	1	0	0	0	0	0	0	0	0	1	0	2	1	0	0	0	0	0	0	0	0	0	0	0	1	0	0	0	0	1	0
20200701	2	0	0	0	0	0	0	0	0	1	0	2	2
20200703	1	0	0	0	0	0	0	0	0	1	0	2	1											0	0	0	0	0	0	0	1
20200703	2	0	0	0	0	0	0	0	0	1	0	2	2
20200703	3	0	0	0	0	0	0	0	1	0	0	1	2
20200703	4	1	0	0	0	0	0	1	1	0	0	1	2
20200717	1	0	0	0	0	0	1	6	1	0	0	1	1	0	0	0	0	0	0	0	0	0	1	0	0	0	0	0	0	1	0
20200717	2	0	0	0	0	0	0	0	0	0	1	3	1	0	0	0	1	0	0	0	0	0	1	0	0	1	0	0	0	1	1
20200717	3	0	0	0	0	0	0	0	1	0	0	1	2
20200717	4	1	0	0	0	0	0	1	0	1	0	2	2
20200717	5	0	0	0	0	0	0	0	1	0	0	1	2
20200717	6	0	0	0	0	0	0	0	1	0	0	1	2
20200717	7	0	0	0	0	0	0	0	1	0	0	1	2
20200717	8	0	0	0	0	0	0	0	1	0	0	1	2
20200719	1	0	0	0	0	0	0	0	1	0	0	1	1	1	0	0	0	0	0	0	0	0	1	0	0	0	0	0	0	1	0
20200719	2	0	0	0	0	0	0	0	1	0	0	1	1	0	0	0	0	0	0	0	0	0	1	1	0	0	0	0	0	1	0
20200719	3	0	0	0	0	0	0	0	1	0	0	1	1	0	0	0	0	0	0	0	0	0	1	0	0	0	0	0	1	1	0
20200719	4	1	0	0	0	0	0	1	1	0	0	1	2
20200723	1	0	0	0	0	0	0	0	0	1	0	2	1	0	0	0	0	0	1	0	0	0	0	0	0	0	0	0	1	1	1
20200723	2	0	0	0	0	0	0	0	1	0	0	1	1	0	0	0	0	0	0	0	0	0	0	0	0	0	0	0	0	1	0
20200723	3	0	0	1	0	0	0	3	1	0	0	1	1	0	0	0	0	0	1	0	0	0	0	0	0	0	0	0	0	1	0
20200723	4	0	0	0	0	0	0	0	0	1	0	2	2
20200723	5	0	0	0	0	0	0	0	1	0	0	1	2
20200723	6	0	0	0	0	0	0	0	0	1	0	2	2
20200723	7	0	1	0	0	0	0	2	0	1	0	2	2
20200723	8	0	0	0	0	0	0	0	0	1	0	2	2
20200723	9	0	0	0	0	0	0	0	1	0	0	1	2
20200725/1	1	1	0	0	0	0	0	1	1	0	0	1	1	0	0	0	0	0	0	0	1	1	0	0	0	0	1	0	0	1	0
20200725/1	2	0	0	0	0	0	1	6	1	0	0	1	1											0	0	0	0	0	0	0	1
20200725/1	3	0	0	0	0	0	0	0	1	0	0	1	1	0	0	0	0	0	0	0	0	0	0	0	0	0	0	0	0	1	1
20200725/1	4	0	0	0	0	0	0	0	0	1	0	2	1	0	0	0	1	0	0	0	0	0	0	0	0	0	0	0	1	1	0
20200725/1	5	0	0	0	0	0	0	0	0	1	0	2	1	0	0	0	1	0	0	0	0	0	0	1	0	0	0	0	0	0	0
20200725/1	6	0	0	0	0	0	0	0	1	0	0	1	2
20200725/1	7	0	0	0	0	0	0	0	1	0	0	1	2
20200725/1	8	0	0	0	0	0	0	0	0	1	0	2	2
20200725/1	9	0	0	0	0	0	0	0	1	0	0	1	2
20200725/1	10	0	0	0	0	0	0	0	1	0	0	1	2
20200725/1	11	0	0	0	0	0	0	0	0	1	0	2	2
20200725/1	12	0	0	0	0	0	1	6	1	0	0	1	2
20200728	1	0	0	0	0	0	0	0	1	0	0	1	1	0	0	0	0	0	0	0	1	0	0	0	0	0	0	0	0	0	0
20200728	2	0	0	0	0	0	0	0	1	0	0	1	2
20200728	3	0	0	0	0	0	0	0	1	0	0	1	2
20200802	1	0	0	0	0	0	0	0	0	1	0	2	1	0	0	0	1	1	1	0	0	0	0	0	0	1	1	1	0	1	3
20200802	2	0	0	0	0	0	0	0	1	0	0	1	1											0	0	0	0	0	0	0	1
20200802	3	0	0	0	0	0	0	0	0	1	0	2	1	0	0	0	0	0	1	0	0	0	0	0	1	0	0	1	0	1	0
20200802	4	0	0	0	0	0	0	0	1	0	0	1	1	0	0	0	0	0	1	0	0	0	1	1	0	0	1	1	0	1	0
20200802	5	0	0	0	0	0	0	0	1	0	0	1	1	0	0	0	1	0	0	0	0	0	0	1	0	0	0	0	0	0	0
20200802	6	0	0	0	0	0	0	0	0	1	0	2	1	0	0	0	0	0	1	0	0	0	0	0	1	0	1	0	0	1	0
20200802	7	0	0	0	0	0	0	0	1	0	0	1	1	0	0	0	0	0	0	0	0	0	1	0	0	0	0	0	0	1	0
20200802	8	0	0	0	0	0	0	0	1	0	0	1	1	0	0	0	0	0	0	0	0	0	0	0	0	0	0	0	0	1	0
20200802	9	0	0	0	0	0	0	0	1	0	0	1	2
20200814	1	0	1	0	0	0	0	2	0	1	0	2	1	0	0	0	0	0	0	0	1	0	0	0	0	0	0	0	0	1	0
20200814	2	0	1	0	0	0	0	2	0	1	0	2	1	0	0	0	0	0	0	1	1	0	0	0	0	1	0	1	0	1	0
20200814	3	0	0	0	0	0	0	0	1	0	0	1	2
20200816	1	1	0	0	0	0	0	1	1	0	0	1	1	0	0	0	0	1	0	0	0	0	0	0	0	1	0	0	0	0	1
20200816	2	0	1	0	0	0	0	2	1	0	0	1	2
20200817	1	0	0	0	0	0	0	0	1	0	0	1	1	0	0	0	1	0	0	0	0	0	0	0	0	0	1	0	0	1	0
20200817	2	0	0	0	0	0	0	0	0	1	0	2	1	0	0	0	0	0	0	0	0	0	1	0	0	0	0	0	0	1	0
20200817	3	0	0	0	0	0	0	0	1	0	0	1	1	0	0	0	0	0	0	1	0	0	0	0	0	0	0	0	0	1	0
20200817	4	0	0	0	0	0	0	0	0	1	0	2	2
20200817	5	0	0	0	0	0	0	0	0	1	0	2	2
20200820/1	1	0	0	0	0	0	0	0	1	0	0	1	1	0	0	0	0	0	0	1	0	0	0	0	0	1	0	0	0	1	0
20200820/1	2	0	0	0	0	0	0	0	1	0	0	1	1											0	0	0	0	0	0	0	1
20200820/1	3	0	0	0	0	0	0	0	1	0	0	1	1											0	0	0	0	0	0	0	1
20200820/1	4	0	0	1	0	0	0	3	1	0	0	1	2
20200820/2	1	1	0	0	0	0	0	1	0	1	0	2	1	0	1	0	0	0	0	0	0	0	0	0	0	1	0	0	0	1	0
20200820/2	2	0	0	0	0	0	0	0	0	1	0	2	2
20200820/2	3	0	0	0	0	0	0	0	1	0	0	1	2
20200825	1	0	0	0	0	0	0	0	1	0	0	1	2
20200825	2	0	0	0	0	0	0	0	0	1	0	2	1											0	0	0	0	0	0	0	1
20200825	3	0	0	0	0	0	0	0	1	0	0	1	1											0	0	0	0	0	0	0	1
20200825	4	0	0	0	0	0	0	0	1	0	0	1	2
20200827	1	0	0	0	0	0	0	0	1	0	0	1	1	0	0	0	1	0	0	0	0	0	0	0	0	0	0	0	0	1	0
20200827	2	0	0	0	0	0	0	0	1	0	0	1	2
20200831	1	0	0	0	0	0	0	0	1	0	0	1	1	0	0	0	0	0	0	0	0	0	0	0	0	1	0	0	0	0	0
20200831	2	0	0	0	0	0	0	0	0	1	0	2	1	0	0	0	0	0	0	0	0	0	0	0	0	0	1	0	0	1	0
20200831	3	0	0	1	0	0	0	3	0	1	0	2	1	0	0	0	0	0	0	0	0	0	0	0	0	1	0	0	0	0	1
20200831	4	0	0	0	0	0	0	0	0	1	0	2	2
20200901	1	0	0	0	0	0	0	0	1	0	0	1	2
20200901	2	0	0	0	0	0	0	0	1	0	0	1	1											0	0	0	0	0	0	0	1
20200901	3	0	0	0	0	0	0	0	0	1	0	2	1											0	0	0	0	0	0	0	1
20200901	4	0	0	1	0	0	0	3	1	0	0	1	2
20200906	1	0	0	0	0	0	0	0	1	0	0	1	1	1	0	0	0	0	1	0	0	0	0	0	0	0	0	1	0	1	0
20200906	2	0	0	0	0	0	0	0	1	0	0	1	1	0	0	0	1	0	0	0	0	0	0	0	0	0	1	0	0	0	1
20200908	1	0	0	0	0	0	0	0	1	0	0	1	1	0	0	1	0	1	0	0	0	0	0	0	0	1	0	0	0	1	0
20200908	2	0	0	0	0	0	0	0	1	0	0	1	1	0	0	0	0	0	1	0	0	0	0
20200908	3	0	0	0	0	0	0	0	0	1	0	2	2
20200908	4	0	0	0	0	0	0	0	0	1	0	2	1	0	0	0	1	0	0	0	0	0	0	0	0	0	0	0	0	1	1
20200908	5	0	0	0	0	0	0	0	0	1	0	2	1	0	0	0	0	0	0	0	0	0	0	0	0	0	0	0	0	1	0
20200908	6	0	0	0	0	0	0	0	1	0	0	1	1	0	0	0	1	0	0	0	0	0	0	0	0	0	0	0	0	1	0
20200908	7	0	0	0	0	0	0	0	1	0	0	1	1											0	0	0	0	0	0	0	1
20200908	8	0	0	0	0	0	0	0	1	0	0	1	1											0	0	0	0	0	0	0	1
20200908	9	0	0	0	0	0	0	0	0	1	0	2	1	0	0	0	0	0	0	0	0	0	0	0	0	0	0	0	0	1	0
20200908	10	0	0	0	0	0	0	0	1	0	0	1	1	0	0	0	1	0	0	0	0	0	0	0	0	0	1	0	0	1	0
20200908	11	0	0	0	0	0	0	0	1	0	0	1	1	0	0	0	0	0	0	0	0	0	1	0	0	1	0	0	0	1	0
20200908	12	1	0	0	0	0	0	1	0	1	0	2	1	0	0	0	0	0	1	0	0	0	0	0	0	1	0	0	1	1	0
20200908	13	0	0	0	0	0	0	0	0	1	0	2	2
20200909	1		0	0	0	0	0	0	0	1	0	2	1	0	0	0	1	0	0	0	0	0	0	1	0	0	0	0	0	1	2
20200909	2		0	0	0	0	0	0	0	1	0	2	2
20200909	3	1	0	0	0	0	0	1	1	0	0	1	1	0	0	0	0	0	1	0	0	0	0	1	0	0	0	0	0	0	2
20200910	1	0	0	0	0	0	0	0	1	0	0	1	1	0	0	0	0	0	0	1	0	0	0	0	0	1	0	0	0	1	0
20200913/1	1	0	0	0	0	0	0	0	1	0	0	1	2
20200913/1	2	0	0	0	0	0	0	0	1	0	0	1	2
20200913/1	3	0	0	0	0	0	0	0	0	1	0	2	2
20200913/2	1	1	0	0	0	0	0	1	0	1	0	2	1	0	0	0	0	0	0	0	0	0	0	0	0	0	1	0	0	0	0
20200914	1	1	0	0	0	0	0	1	1	0	0	1	1	0	0	0	0	0	0	0	0	0	0	0	0	0	1	0	0	1	2
20200914	2	0	0	0	0	0	0	0	0	1	0	2	2
20200914	3	0	0	0	0	0	0	0	0	1	0	2	1	0	0	0	1	0	0	0	0	0	0	0	0	0	1	0	1	1	0
20200914	4	0	0	0	0	0	0	0	0	1	0	2	1	0	0	0	1	0	0	0	0	0	0	0	0	0	1	0	0	1	0
20200914	5	0	0	0	0	0	0	0	1	0	0	1	1	0	0	0	0	0	0	0	0	0	0	0	0	0	1	0	0	0	1
20200914	6	0	0	0	0	0	0	0	1	0	0	1	1	0	0	0	0	0	0	0	0	0	0	0	0	1	0	0	0	1	0
20200914	7	0	0	0	0	0	0	0	1	0	0	1	2
20200914	8	0	0	0	0	0	0	0	1	0	0	1	2

## Sheet: Inter-rater reliability
Date	Rater 1 (TTM)	Rater 2 (TTM)	Rater 1 (MI)	Rater 2 (MI)
20170308/2	3	3	3	3
20170308/2	3	3	1	1
20170308/2	4	4	4	4
20170308/2	4	4	4	4
20170308/2	4	4	4	4
20170308/2	4	4	4	4
20170308/2	4	4	4	4
20170319	3	3	1	1
20170319	4	4	4	4
20170324	1	3	1	1
20170408/1			1	1
20170408/1	4	4	4	4
20170408/2	1	1	1	1
20170408/2			1	1
20170408/2	4	4	4	4
20170413			2	2
20170418			1	1
20170424	1	1	3	3
20170628			1	1
20170829			2	3
20170829			1	1
20171124	1	1	1	1
20171206/2	1	1	3	3
20171229/1			2	2
20171229/1	4	4	4	4
20171231/1			3	3
20180109	2	2	1	1
20180202			3	3
20180218			3	3
20180218	2	2	3	3
20180218	2	2	1	1
20180218	1	1	3	3
20180226			2	2
20180226			3	3
20180326			2	2
20180326			2	2
20180326	4	4	4	4
20180326	4	4	4	4
20180328/1	1	1	3	3
20180328/1	4	4	4	4
20180329	2	2	1	1
20180329	4	4	4	4
20180329	4	4	4	4
20180329	4	4	4	4
20180423			1	1
20180423	2	3	1	1
20180423	4	4	4	4
20180423	4	4	4	4
20180423	4	4	4	4
20180423	4	4	4	4
20180424/1	1	1	1	1
20180424/1	4	4	4	4
20180425			2	2
20180425			1	1
20180425			2	1
20180425			1	1
20180425	4	4	4	4
20180507			3	3
20180507	4	4	4	4
20180513			2	2
20180513	4	4	4	4
20180513	4	4	4	4
20180513	4	4	4	4
20180520			2	2
20180520			2	2
20180520			2	2
20180520			2	2
20180520	4	4	4	4
20180520	4	4	4	4
20180520	4	4	4	4
20180520	4	4	4	4
20180520	4	4	4	4
20180520	4	4	4	4
20180525/2			2	2
20180531/1			2	2
20180531/1	4	4	4	4
20180531/1	4	4	4	4
20180612	1	1	1	1
20180612	2	2	3	3
20180612	4	4	4	4
20180612	4	4	4	4
20180619	1	1	3	3
20180619	1	1	1	1
20180619	4	4	4	4
20180619	4	4	4	4
20180619	4	4	4	4
20180619	4	4	4	4
20180619	4	4	4	4
20180619	4	4	4	4
20180619	4	4	4	4
20180619	4	4	4	4
20180619	4	4	4	4
20180620/2			2	2
20180621/1	1	3	1	1
20180621/1	4	4	4	4
20180623/2	1	1	1	1
20180701/1			2	2
20180701/1	4	4	4	4
20180705/1	4	4	4	4
20180705/1	4	4	4	4
20180719	1	1	2	2
20180725/1	4	4	4	4
20180725/1	4	4	4	4
20180725/1	4	4	4	4
20180803/2	4	4	4	4
20180807			2	2
20180807			3	3
20180807	4	4	4	4
20180807	4	4	4	4
20180924/2	1	1	3	3
20180924/2	2	2	2	3
20180928	1	1	3	3
20180928	4	4	4	4
20181002			1	1
20181002	3	3	1	3
20181002	4	4	2	4
20181007	1	1	3	3
20181008/2	1	1	3	3
20181008/2	4	4	4	4
20181008/2	4	4	4	4
20181010/1			3	3
20181010/1	4	4	4	4
20181017/2	1	1	1	1
20181017/2	2	2	1	1
20181017/2	4	4	4	4
20181113	1	1	1	1
20181114			2	2
20181114	4	4	4	4
20181114	4	4	4	4
20181120/2	2	2	3	3
20181120/2	2	2	1	1
20181120/2	4	4	4	4
20181120/2	4	4	4	4
20181205/1			2	2
20181205/2	1	3	1	1
20181205/2	4	4	4	4
20181205/2	4	4	4	4
20181205/2	4	4	4	4
20181205/2	4	4	4	4
20181209			2	2
20181222/2			2	2
20181229			1	1
20181229	4	4	4	4
20190105/1			2	2
20190105/1			2	2
20190105/1			2	2
20190105/1	4	4	4	4
20190105/1	4	4	4	4
20190105/1	4	4	4	4
20190105/1	4	4	4	4
20190105/1	4	4	4	4
20190106/2	2	2	3	3
20190114/2	1	1	3	3
20190114/2	4	4	4	4
20190114/2	4	4	4	4
20190116/2			3	3
20190116/2			1	1
20190116/2	4	4	4	4
20190119			3	3
20190120/2	3	3	1	1
20190202	2	2	3	1
20190202			2	3
20190202			1	1
20190202	2	2	3	3
20190202			1	1
20190202	4	4	4	4
20190202	4	4	4	4
20190202	4	4	4	4
20190202	4	4	4	4
20190202	4	4	4	4
20190202	4	4	4	4
20190202	4	4	4	4
20190202	4	4	4	4
20190225			1	1
20190225	2	3	1	1
20190310/2	1	1	3	3
20190310/2	4	4	4	4
20190310/2	4	4	4	4
20190310/2	4	4	4	4
20190314	2	2	1	1
20190314	4	4	4	4
20190320/2	2	2	1	1
20190325	2	2	1	1
20190326			1	1
20190326	1	1	3	1
20190326	1	1	1	1
20190326	1	1	1	1
20190326			1	1
20190326	1	1	1	1
20190326	1	1	3	3
20190326	1	2	1	1
20190326	1	1	3	3
20190326	1	1	1	1
20190326	1	1	1	1
20190326	1	1	1	1
20190326	1	1	1	1
20190326	1	1	1	1
20190326	1	1	1	1
20190326	1	1	1	1
20190326	1	1	3	3
20190326	1	3	1	1
20190326	1	1	1	1
20190326	1	1	1	1
20190326	1	1	1	1
20190326	1	1	1	1
20190326	1	1	1	1
20190326	1	1	1	1
20190326	1	1	1	1
20190326	4	4	4	4
20190326	4	4	4	4
20190326	4	4	4	4
20190326	4	4	4	4
20190331	1	1	1	1
20190407			2	2
20190407	3	3	2	3
20190416	1	1	3	3
20190416	4	4	4	4
20190423/1	1	1	1	1
20190423/1	4	4	4	4
20190423/3			2	2
20190516			2	2
20190516	4	4	4	4
20190517			2	2
20190517	4	4	4	4
20190527	1	2	3	3
20190530	1	1	1	1
20190602			1	1
20190602	4	4	4	4
20190602	4	4	4	4
20190602	4	4	4	4
20190602	4	4	4	4
20190620			2	2
20190620			1	1
20190621	2	2	1	1
20190703	2	2	3	3
20190703	4	4	4	4
20190718	1	1	1	1
20190808			3	3
20190808			2	2
20190808			2	2
20190808	1	1	1	1
20190808	4	4	4	4
20190808	4	4	4	4
20190808	4	4	4	4
20190808	4	4	4	4
20190815			2	2
20190817	2	2	1	1
20190817	4	4	4	4
20190826	1	1	1	1
20190826	4	4	4	4
20190921			3	3
20190921	4	4	4	4
20190930/1			1	2
20190930/1	4	4	4	4
20190930/1	4	4	4	4
20190930/2			2	2
20190930/2			1	1
20190930/2	2	3	1	1
20190930/2	4	4	4	4
20190930/2	4	4	4	4
20190930/2	4	4	4	4
20190930/2	4	4	4	4
20190930/2	4	4	4	4
20190930/2	4	4	4	4
20190930/2	4	4	4	4
20190930/2	4	4	4	4
20190930/2	4	4	4	4
20190930/2	4	4	4	4
20190930/2	4	4	4	4
20190930/2	4	4	4	4
20190930/2	4	4	4	4
20190930/2	4	4	4	4
20190930/2	4	4	4	4
20190930/2	4	4	4	4
20190930/2	4	4	4	4
20190930/2	4	4	4	4
20190930/2	4	4	4	4
20190930/2	4	4	4	4
20190930/2	4	4	4	4
20190930/2	4	4	4	4
20190930/2	4	4	4	4
20190930/2	4	4	4	4
20191001/1			1	1
20191001/1			1	1
20191001/1			3	3
20191001/1			2	2
20191001/1	4	4	4	4
20191001/1	4	4	4	4
20191001/1	4	4	4	4
20191001/1	4	4	4	4
20191001/1	4	4	4	4
20191001/1	4	4	4	4
20191013	2	2	3	3
20191013	4	4	4	4
20191013	4	4	4	4
20191013	4	4	4	4
20191014	2	2	2	3
20191014	3	3	3	3
20191014			1	1
20191014	4	4	4	4
20191014	4	4	4	4
20191014	4	4	4	4
20191014	4	4	4	4
20191018			1	1
20191018	1	3	1	1
20191018	1	1	1	1
20191018			1	1
20191025	2	2	1	1
20191025	4	4	4	4
20191025	4	4	4	4
20191025	4	4	4	4
20191026			1	1
20191030	2	2	1	1
20191030	2	3	1	1
20191030	2	2	3	3
20191030	4	4	4	4
20191030	4	4	4	4
20191030	4	4	4	4
20191030	4	4	4	4
20191106			2	2
20191106			2	2
20191106			2	2
20191106			1	1
20191106	4	4	4	4
20191106	4	4	4	4
20191106	4	4	4	4
20191106	4	4	4	4
20191106	4	4	4	4
20191106	4	4	4	4
20191111	3	3	1	1
20191111	2	2	1	1
20191111	1	1	1	1
20191111	4	4	4	4
20191113	2	2	3	3
20191113	4	4	4	4
20191114			2	2
20191114	4	4	4	4
20191115	1	1	1	1
20191123	3	3	2	3
20191123	1	1	3	1
20191126	2	2	3	3
20191126	1	1	1	1
20191126			1	1
20191126	1	1	1	1
20191126	4	4	4	4
20191126	4	4	4	4
20191126	4	4	4	4
20191201	1	1	1	1
20191203	1	1	1	1
20191205			2	2
20191205	2	2	1	1
20191205			1	1
20191205			2	2
20191207	1	2	1	1
20191207	4	4	4	4
20191207	4	4	4	4
20191208	1	1	1	1
20191208	4	4	4	4
20191208	4	4	4	4
20191208	4	4	4	4
20191208	4	4	4	4
20191208	4	4	4	4
20191208	4	4	4	4
20191208	4	4	4	4
20191217/2	1	1	3	3
20191217/2	1	1	1	1
20191217/2	1	1	1	1
20191217/2	1	1	1	3
20191217/2			1	1
20191217/2			3	3
20191217/2	4	4	4	4
20191217/2	4	4	4	4
20191217/2	4	4	4	4
20191217/2	4	4	4	4
20191217/2	4	4	4	4
20191217/2	4	4	4	4
20191217/2	4	4	4	4
20191217/2	4	4	4	4
20191217/2	4	4	4	4
20191217/2	4	4	4	4
20191217/2	4	4	4	4
20191217/2	4	4	4	4
20191217/2	4	4	4	4
20191217/2	4	4	4	4
20191217/2	4	4	4	4
20191217/2	4	4	4	4
20191217/2	4	4	4	4
20191217/2	4	4	4	4
20191228	2	2	2	2
20191228	2	2	1	1
20191228	2	2	1	1
20191228	2	2	1	1
20191228	4	4	4	4
20191228	4	4	4	4
20191229	3	2	3	3
20191229	1	1	3	3
20191229			2	2
20191229			2	2
20191229			2	2
20191229	4	4	4	4
20191229	4	4	4	4
20191229	4	4	4	4
20191229	4	4	4	4
20191229	4	4	4	4
20191229	4	4	4	4
20191229	4	4	4	4
20191229	4	4	4	4
20191229	4	4	4	4
20191229	4	4	4	4
20191229	4	4	4	4
20191229	4	4	4	4
20191229	4	4	4	4
20191229	4	4	4	4
20200101	2	2	2	3
20200101	1	1	1	1
20200101	1	1	1	1
20200101	3	1	1	1
20200101	4	4	4	4
20200101	4	4	4	4
20200106			1	1
20200106	4	4	4	4
20200106	4	4	4	4
20200106	4	4	4	4
20200106	4	4	4	4
20200118			2	2
20200118	4	4	4	4
20200120	1	1	3	3
20200120			2	2
20200120			2	2
20200120	4	4	4	4
20200120	4	4	4	4
20200121			2	2
20200121			2	2
20200121	4	4	4	4
20200121	4	4	4	4
20200121	4	4	4	4
20200121	4	4	4	4
20200121	4	4	4	4
20200121	4	4	4	4
20200121	4	4	4	4
20200121	4	4	4	4
20200121	4	4	4	4
20200121	4	4	4	4
20200121	4	4	4	4
20200121	4	4	4	4
20200121	4	4	4	4
20200121	4	4	4	4
20200121	4	4	4	4
20200121	4	4	4	4
20200121	4	4	4	4
20200123			2	2
20200123	2	3	3	3
20200123			2	2
20200123			2	2
20200123			1	1
20200123	4	4	4	4
20200123	4	4	4	4
20200123	4	4	4	4
20200123	4	4	4	4
20200123	4	4	4	4
20200123	4	4	4	4
20200123	4	4	4	4
20200123	4	4	4	4
20200123	4	4	4	4
20200123	4	4	4	4
20200123	4	4	4	4
20200123	4	4	4	4
20200123	4	4	4	4
20200123	4	4	4	4
20200123	4	4	4	4
20200123	4	4	4	4
20200125			2	2
20200125	3	3	1	1
20200125	4	4	4	4
20200125	4	4	4	4
20200202			3	1
20200202	4	4	4	4
20200202	4	4	4	4
20200202	4	4	4	4
20200202	4	4	4	4
20200202	4	4	4	4
20200202	4	4	4	4
20200202	4	4	4	4
20200202	4	4	4	4
20200205			1	1
20200205	4	4	4	4
20200205	4	4	4	4
20200205	4	4	4	4
20200205	4	4	4	4
20200205	4	4	4	4
20200211			2	2
20200211	4	4	4	4
20200211	4	4	4	4
20200211	4	4	4	4
20200219	2	2	1	1
20200219	1	1	2	2
20200219	2	2	1	1
20200219			2	2
20200219	4	4	4	4
20200219	4	4	4	4
20200219	4	4	4	4
20200219	4	4	4	4
20200219	4	4	4	4
20200219	4	4	4	4
20200306	1	1	3	1
20200306	1	1	2	3
20200306			1	1
20200306	4	4	4	4
20200306	4	4	4	4
20200306	4	4	4	4
20200306	4	4	4	4
20200306	4	4	4	4
20200306	4	4	4	4
20200306	4	4	4	4
20200311/1	1	1	3	3
20200311/1	4	4	4	4
20200311/1	4	4	4	4
20200311/1	4	4	4	4
20200311/1	4	4	4	4
20200311/1	4	4	4	4
20200311/1	4	4	4	4
20200311/1	4	4	4	4
20200311/1	4	4	4	4
20200311/1	4	4	4	4
20200311/1	4	4	4	4
20200311/1	4	4	4	4
20200315	2	2	1	1
20200315	4	4	4	4
20200328	2	2	1	1
20200328			2	2
20200328	1	1	1	1
20200328	4	4	4	4
20200331			1	1
20200331	4	4	4	4
20200406/1			1	3
20200406/1			2	2
20200406/1	2	2	1	1
20200406/1	2	3	1	1
20200406/1	2	2	3	3
20200406/1			2	2
20200406/1			1	1
20200406/1			2	2
20200406/1	4	4	4	4
20200406/1	4	4	4	4
20200406/1	4	4	4	4
20200415/2			2	2
20200415/2	4	4	4	4
20200415/2	4	4	4	4
20200417/2			2	2
20200417/2			1	1
20200417/2	4	4	4	4
20200417/2	4	4	4	4
20200417/2	4	4	4	4
20200417/2	4	4	4	4
20200417/2	4	4	4	4
20200421/1			2	2
20200421/1	4	4	4	4
20200421/1	4	4	4	4
20200421/1	4	4	4	4
20200421/1	4	4	4	4
20200421/1	4	4	4	4
20200421/1	4	4	4	4
20200421/1	4	4	4	4
20200421/1	4	4	4	4
20200421/1	4	4	4	4
20200421/1	4	4	4	4
20200421/1	4	4	4	4
20200421/1	4	4	4	4
20200421/1	4	4	4	4
20200421/1	4	4	4	4
20200425	1	1	1	1
20200425	1	1	1	1
20200425			2	2
20200425	1	1	1	1
20200425	2	2	2	3
20200425	1	1	1	1
20200425	1	1	1	1
20200425	4	4	4	4
20200425	4	4	4	4
20200425	4	4	4	4
20200425	4	4	4	4
20200428			2	2
20200430			3	3
20200430			1	1
20200430	1	1	1	1
20200430	2	2	1	1
20200430			1	1
20200430			1	1
20200430	4	4	4	4
20200430	4	4	4	4
20200430	4	4	4	4
20200430	4	4	4	4
20200430	4	4	4	4
20200430	4	4	4	4
20200430	4	4	4	4
20200430	4	4	4	4
20200430	4	4	4	4
20200503/2			2	2
20200506	3	2	1	3
20200506	3	1	1	1
20200506	1	1	3	3
20200506	4	4	4	4
20200506	4	4	4	4
20200510			1	1
20200513			1	1
20200513	4	4	4	4
20200513			2	2
20200513	4	4	4	4
20200513	4	4	4	4
20200513	4	4	4	4
20200519	2	2	3	3
20200519	4	4	4	4
20200519	4	4	4	4
20200521	1	1	1	1
20200521	3	3	1	1
20200521	3	3	1	1
20200521	1	1	1	1
20200521	1	1	3	3
20200521	4	4	4	4
20200521	4	4	4	4
20200521	4	4	4	4
20200521	4	4	4	4
20200521	4	4	4	4
20200521	4	4	4	4
20200521	4	4	4	4
20200525			2	2
20200525	4	4	4	4
20200525	4	4	4	4
20200525	4	4	4	4
20200525	4	4	4	4
20200525	4	4	4	4
20200525	4	4	4	4
20200528			2	3
20200528			2	2
20200528			2	2
20200528			2	2
20200528	1	1	1	1
20200528	4	4	4	4
20200531/1			2	2
20200531/1	4	4	4	4
20200531/1	4	4	4	4
20200531/1	4	4	4	4
20200531/1	4	4	4	4
20200531/1	4	4	4	4
20200531/1	4	4	4	4
20200531/1	4	4	4	4
20200531/2			1	1
20200601			2	2
20200601			1	1
20200601			1	1
20200601	1	1	1	1
20200601	1	1	3	3
20200601	3	3	3	3
20200601	4	4	4	4
20200601	4	4	4	4
20200601	4	4	4	4
20200601	4	4	4	4
20200601	4	4	4	4
20200602/1			2	2
20200602/1	2	2	1	1
20200602/1			2	2
20200602/1	1	1	1	1
20200603	2	2	3	3
20200603			2	2
20200603			2	1
20200603	2	3	1	1
20200603	1	1	1	1
20200609			2	2
20200616			2	2
20200616	4	4	4	4
20200616	4	4	1	4
20200616	4	4	4	4
20200619	3	3	1	1
20200619	2	2	1	1
20200619	2	2	1	1
20200619	4	4	4	4
20200621/2	3	3	3	3
20200621/2			2	2
20200621/2	4	4	4	4
20200621/2	4	4	4	4
20200621/2	4	4	4	4
20200621/2	4	4	4	4
20200621/2	4	4	4	4
20200625/1	2	2	3	3
20200625/1	2	2	1	1
20200625/1	1	1	1	1
20200625/1			2	2
20200625/1			2	2
20200625/1	2	2	1	1
20200625/1			2	2
20200625/1	2	2	1	1
20200625/1			2	2
20200625/1	4	4	4	4
20200625/1	4	4	4	4
20200625/1	4	4	4	4
20200625/1	4	4	4	4
20200625/1	4	4	4	4
20200625/1	4	4	4	4
20200625/1	4	4	4	4
20200625/1	4	4	4	4
20200625/1	4	4	4	4
20200626			1	1
20200626	4	4	4	4
20200626	4	4	4	4
20200626	4	4	4	4
20200627			3	1
20200627	2	2	1	1
20200627	4	4	4	4
20200701			1	1
20200701	4	4	4	4
20200703			2	2
20200703	4	4	4	4
20200703	4	4	4	4
20200703	4	4	4	4
20200717	2	2	1	1
20200717	3	3	3	3
20200717	4	4	4	4
20200717	4	4	4	4
20200717	4	4	4	4
20200717	4	4	4	4
20200717	4	4	4	4
20200717	4	4	4	4
20200719	3	3	1	1
20200719	2	2	1	1
20200719	2	2	1	1
20200719	4	4	4	4
20200723	2	2	2	3
20200723			1	1
20200723	2	2	1	1
20200723	4	4	4	4
20200723	4	4	4	4
20200723	4	4	4	4
20200723	4	4	4	4
20200723	4	4	4	4
20200723	4	4	4	4
20200725/1	2	2	1	1
20200725/1			2	2
20200725/1			3	3
20200725/1	1	3	1	1
20200725/1	1	1	1	1
20200725/1	4	4	4	4
20200725/1	4	4	4	4
20200725/1	4	4	4	4
20200725/1	4	4	4	4
20200725/1	4	4	4	4
20200725/1	4	4	4	4
20200725/1	4	4	4	4
20200728	2	2	1	1
20200728	4	4	4	4
20200728	4	4	4	4
20200802	3	3	3	3
20200802			2	2
20200802	2	2	1	1
20200802	2	2	1	1
20200802	1	1	1	1
20200802	2	2	1	1
20200802	2	2	1	1
20200802			1	1
20200802	4	4	4	4
20200814	2	2	1	1
20200814	2	2	1	1
20200814	4	4	4	4
20200816	1	1	3	3
20200816	4	4	4	4
20200817	1	1	1	1
20200817	2	2	1	1
20200817	2	2	1	1
20200817	4	4	4	4
20200817	4	4	4	4
20200820/1	2	2	1	1
20200820/1			2	2
20200820/1			2	2
20200820/1	4	4	4	4
20200820/2	1	1	1	1
20200820/2	4	4	4	4
20200820/2	4	4	4	4
20200825	4	4	4	4
20200825			3	2
20200825			2	2
20200825	4	4	4	4
20200827	1	1	1	1
20200827	4	4	4	4
20200831			1	1
20200831			1	1
20200831			2	3
20200831	4	4	4	4
20200901	4	4	4	4
20200901			2	2
20200901			2	2
20200901	4	4	4	4
20200906	3	2	1	1
20200906	1	1	3	3
20200908	1	1	1	1
20200908	2	2	1	1
20200908	4	4	4	4
20200908	1	1	3	3
20200908			1	1
20200908	1	1	1	1
20200908			2	2
20200908			2	2
20200908			1	1
20200908	1	1	1	1
20200908	2	2	1	1
20200908	2	2	1	1
20200908	4	4	4	4
20200909	1	1	3	3
20200909	4	4	4	4
20200909	2	2	1	3
20200910	2	2	1	1
20200913/1	4	4	4	4
20200913/1	4	4	4	4
20200913/1	4	4	4	4
20200913/2			1	1
20200914			3	3
20200914	4	4	4	4
20200914	1	1	1	1
20200914	1	1	1	1
20200914			3	3
20200914			1	1
20200914	4	4	4	4
20200914	4	4	4	4

## Sheet: Participants (FB insights)
Date	Lifetime Total Likes	Lifetime Likes by Gender and Age	F.13-17	F.18-24	F.25-34	F.35-44	F.45-54	F.55-64	F.65+	M.13-17	M.18-24	M.25-34	M.35-44	M.45-54	M.55-64	M.65+	Lifetime Likes By Country	AT	AU	BA	BD	BE	CA	CH	CY	CZ	DE	DK	EE	EG	ES	FR	GB	HU	IE	IL	IT	KI	LU	MA	MT	NL	NO	PT	RO	RS	RU	SA	SD
	Lifetime: The total number of people who have liked your Page. (Unique Users)	Lifetime: Aggregated demographic data about the people who like your Page based on the age and gender information they provide in their user profiles. (Unique Users)															Lifetime: Aggregated Facebook location data, sorted by country (top 50), about the people who like your Page. (Unique Users)
2020-09-14	10227		81	1894	2478	584	229	89	51	124	1951	2229	359	88	33	26		39	1	1	1	3	1	13	1	2	81	2	1	1	1	2	49	9796	2	1	2	1	1	1	1	11	1	1	76	77	1	2	1
Date	Weekly Total Reach	Weekly Reach Demographics	F.13-17	F.18-24	F.25-34	F.35-44	F.45-54	F.55-64	F.65+	M.13-17	M.18-24	M.25-34	M.35-44	M.45-54	M.55-64	M.65+	Weekly Reach by Country	AE	AF	AL	AT	AU	BA	BD	BE	BR	CA	CD	CH	CY	CZ	DE	DK	DO	DZ	EG	ES	ET	FI	FR	GB	GR	HU	ID	IE	IL	IN	IQ	IT
	Weekly: The number of people who had any content from your Page or about your Page enter their screen. This includes posts, check-ins, ads, social information from people who interact with your Page and more. (Unique Users)	Weekly: Total Page Reach by age and gender. (Unique Users)															Weekly: Total Page Reach by user country. (Unique Users)
2020-09-14	11507		32	2053	2289	571	275	144	58	71	2626	2579	467	185	79	41			1	1	39	3	1	3			1		11	1		95	2	1			3			2	42		11072		2	1	6		1
[truncated: 35 more columns]

## Sheet: Participants (smoking habits)
Time of participation	Informed consent	Age	Gender	Location	Smoking status	Tobbaco products	Smoking frequency	Time to first cigarette	Cessation stages (smokers)	Cessation stages (ex-smokers)
2020-09-09 11:43:48	Yes	28	2	1	1	1	1	1	2
2020-09-09 11:50:26	Yes	49	2	1	2					4
2020-09-09 11:59:45	Yes	19	2	1	1	1	1	2	3
2020-09-09 12:02:17	Yes	35	2	1	3
2020-09-09 12:03:37	Yes	49	1	2	2					5
2020-09-09 12:18:51	Yes	49	1	1	1	1	1	1	2
2020-09-09 12:20:10	Yes	17	1	1	1	1, 6	2	2	3
2020-09-09 12:23:41	Yes	30	1	1	1	3	1	1	3
2020-09-09 12:26:12	Yes	32	2	1	2					4
2020-09-09 12:34:38	Yes	33	2	1	2					5
2020-09-09 12:40:50	Yes	16	1	1	1	3	1	1	3
2020-09-09 13:00:27	Yes	35	2	1	2					5
2020-09-09 13:09:17	Yes	36	1	1	2					4
2020-09-09 13:29:09	Yes	45	1	1	1	1	1	2	1
2020-09-09 13:32:48	Yes	41	1	1	1	1	1	1	2
2020-09-09 13:55:41	Yes	21	1	1	1	2, 3	1	1	3
2020-09-09 13:58:51	Yes	30	2	1	1	1	1	1	3
2020-09-09 14:07:26	Yes	19	1	1	1	1, 2	1	1	3
2020-09-09 14:21:23	Yes	27	2	1	1	1	1	1	3
2020-09-09 14:32:34	Yes	18	2	1	1	2	1	1	1
2020-09-09 14:58:38	Yes	15	1	2	3
2020-09-09 15:35:37	Yes	17	1	1	1	1	1	1	1
2020-09-09 15:43:39	Yes	22	1	1	1	1, 5, 6	1	2	1
2020-09-09 15:54:06	Yes	24	1	1	1	1	1	2	1
2020-09-09 15:54:07	Yes	25	2	1	1	1, 2	1	1	3
2020-09-09 17:29:40	Yes	32	2	1	4
2020-09-09 18:12:33	Yes	53	1	1	3
2020-09-09 19:35:03	Yes	46	2	1	1	1	1	1	2
2020-09-09 20:40:19	Yes	25	2	1	3
2020-09-09 21:18:19	Yes	23	1	1	1	1	1	1	1
2020-09-09 21:28:28	Yes	26	1	1	3
2020-09-09 21:36:47	Yes	42	1	1	1	1	1	1	3
2020-09-09 22:32:33	Yes	21	2	1	1	1, 2	1	1	1
2020-09-10 08:01:44	Yes	18	1	1	3
2020-09-10 11:48:39	Yes	42	2	1	2					4
2020-09-10 13:05:20	Yes	35	2	1	1	3	1	1	1
2020-09-10 20:42:52	Yes	21	2	1	2					6
2020-09-11 08:54:02	Yes	25	1	1	2					4
2020-09-11 08:55:32	Yes	27	1	1	1	1, 4	1	1	3
2020-09-11 08:56:23	Yes	18	1	1	3
2020-09-11 10:03:46	Yes	33	1	1	4
2020-09-11 10:26:41	Yes	20	2	1	3
2020-09-11 10:53:24	Yes	22	2	1	1	1	1	1	3
2020-09-11 11:19:34	Yes	28	1	1	2					4
2020-09-11 11:28:46	Yes	18	1	1	2					4
2020-09-11 11:40:03	Yes	25	1	1	2					6
2020-09-11 11:47:21	Yes	20	1	1	1	1, 2, 3	1	2	2
2020-09-11 11:56:20	Yes	26	1	1	3
2020-09-11 12:07:45	Yes	29	1	1	1	3	1	1	3
2020-09-11 12:25:52	Yes	36	2	1	3
2020-09-11 13:01:28	Yes	18	1	1	1	1	1	2	3
2020-09-11 13:09:31	Yes	23	2	1	2					4
2020-09-11 13:19:03	Yes	50	1	1	2					5
2020-09-11 13:30:56	Yes	20	1	1	2					6
2020-09-11 13:48:46	Yes	16	1	1	1	1, 2, 4, 6	1	1	1
2020-09-11 14:17:59	Yes	22	2	1	2					6
2020-09-11 14:58:54	Yes	21	1	1	1	3	1	1	3
2020-09-11 14:59:13	Yes	22	1	1	3
2020-09-11 16:40:49	Yes	30	1	1	1	2	1	1	2
2020-09-11 17:01:27	Yes	22	1	1	1	1	1	1	3
2020-09-11 17:03:26	Yes	20	1	1	1	5, 4	1	1	3
2020-09-11 17:23:17	Yes	35	1	1	1	1	1	1	3
2020-09-11 17:53:59	Yes	18	1	1	1	1, 3, 5	1	2	1
2020-09-11 18:22:00	Yes	24	1	1	1	1, 5	1	1	3
2020-09-11 18:46:14	Yes	21	2	1	1	1, 6	1	1	3
2020-09-11 19:19:44	Yes	21	2	1	3
2020-09-11 19:29:35	Yes	27	1	1	1	1, 2, 3	1	1	3
2020-09-11 20:44:13	Yes	32	2	1	1	1, 2	1	1	3
2020-09-11 21:09:31	Yes	25	2	1	1	3	1	2	3
2020-09-12 06:55:47	Yes	29	2	1	2					4
2020-09-12 07:01:04	Yes	30	2	1	1	1	1	1	3
2020-09-12 08:15:44	Yes	21	2	1	3
2020-09-12 08:43:22	Yes	19	1	1	1	3	1	1	3
2020-09-12 08:50:18	Yes	19	2	1	1	1, 2, 4	1	1	1
2020-09-12 09:00:26	Yes	23	1	1	1	3	1	2	1
2020-09-12 09:30:05	Yes	25	1	1	1	3	1	1	3
2020-09-12 09:45:06	Yes	27	1	1	2					6
2020-09-12 10:44:32	Yes	25	2	1	2					4
2020-09-12 12:00:32	Yes	28	1	1	2					4
2020-09-12 12:27:19	Yes	23	2	1	1	1, 2, 5, 4, 4, 5	1	1	3
2020-09-12 12:30:16	Yes	22	1	1	2					6
2020-09-12 12:40:32	Yes	18	1	1	2					4
2020-09-12 12:42:21	Yes	19	2	1	2					4
2020-09-12 15:01:36	Yes	26	1	1	1	1	1	1	3
2020-09-12 16:12:59	Yes	29	1	1	2					4
2020-09-12 16:20:15	Yes	34	2	1	3
2020-09-12 16:26:14	Yes	39	2	1	2					4
2020-09-12 16:49:35	Yes	20	2	1	1	2	1	1	3
2020-09-12 16:56:37	Yes	21	1	1	1	1, 2	1	1	3
2020-09-12 17:50:00	Yes	20	1	1	3
2020-09-12 18:19:53	Yes	25	1	1	1	1, 2	1	1	3
2020-09-12 18:43:30	Yes	22	2	1	1	3	1	1	3
2020-09-12 19:14:06	Yes	18	1	1	1	1, 2	1	1	3
2020-09-12 19:37:57	Yes	35	2	1	1	1	1	1	3
2020-09-12 20:21:13	Yes	28	1	1	1	1	1	1	2
2020-09-12 21:25:19	Yes	38	1	1	1	1, 2	1	1	3
2020-09-12 22:06:08	Yes	30	2	1	1	1	1	2	2
2020-09-12 22:13:36	Yes	27	2	1	3
2020-09-12 22:29:22	Yes	18	1	1	1	1, 2, 4, 6	1	2	3
2020-09-12 23:07:56	Yes	25	1	1	1	1	1	1	3
2020-09-12 23:09:17	Yes	31	1	1	1	3	1	2	1
2020-09-12 23:37:47	Yes	21	2	1	1	2	1	1	3
2020-09-13 07:59:32	Yes	19	2	1	1	1	1	2	3
2020-09-13 08:00:26	Yes	23	1	1	1	1	1	1	3
2020-09-13 08:12:44	Yes	33	2	1	1	2	1	1	3
2020-09-13 08:24:18	Yes	36	2	1	1	1	1	1	2
2020-09-13 08:34:21	Yes	26	2	1	1	1	1	1	2
2020-09-13 09:05:08	Yes	37	1	1	1	1, 2	1	1	3
2020-09-13 09:36:13	Yes	39	1	1	1	2	1	2	3
2020-09-13 09:40:42	Yes	21	1	1	3
2020-09-13 09:57:20	Yes	21	1	1	2					4
2020-09-13 12:29:32	Yes	24	1	1	3
2020-09-13 12:40:32	Yes	19	2	1	2					4
2020-09-13 12:44:41	Yes	20	1	1	1	2	1	1	1
2020-09-13 13:50:25	Yes	21	2	1	1	1, 4, 4	1	1	3
2020-09-13 13:53:25	Yes	23	1	1	1	2, 3, 4	1	1	3
2020-09-13 14:17:44	Yes	34	1	1	2					4
2020-09-13 14:19:17	Yes	31	1	2	1	1	2	2	2
2020-09-13 14:25:38	Yes	36	1	2	1	1, 2	1	1	2
2020-09-13 14:31:38	Yes	27	1	1	1	1	2	2	2
2020-09-13 14:34:21	Yes	18	2	1	1	1, 5	1	1	3
2020-09-13 14:37:59	Yes	39	1	1	1	2	1	1	2
2020-09-13 14:39:06	Yes	17	1	1	1	1, 2	1	1	3
2020-09-13 15:02:35	Yes	22	1	1	1	1, 3	1	1	2
2020-09-13 15:06:25	Yes	34	1	1	1	3	1	1	3
2020-09-13 15:10:15	Yes	33	2	1	2					6
2020-09-13 15:21:43	Yes	35	1	1	1	1, 3	1	1	3
2020-09-13 15:28:36	Yes	30	1	1	1	1	1	1	3
2020-09-13 16:02:33	Yes	32	1	1	2					4
2020-09-13 16:41:20	Yes	32	2	1	1	2	1	1	2
2020-09-13 16:56:13	Yes	33	2	1	2					6
2020-09-13 17:32:56	Yes	20	2	1	1	1, 3, 6	1	1	3
2020-09-13 18:33:14	Yes	62	1	1	1	1	1	1	3
2020-09-13 18:52:29	Yes	18	1	1	3
2020-09-13 19:04:09	Yes	18	1	1	1	1	1	2	3
2020-09-13 19:19:50	Yes	22	1	1	3
2020-09-13 19:24:20	Yes	27	1	1	3
2020-09-13 19:40:14	Yes	27	2	1	1	2	1	1	3
2020-09-13 19:54:09	Yes	32	2	1	2					4
2020-09-13 20:42:44	Yes	18	1	1	2					6
2020-09-13 20:58:55	Yes	31	1	1	2					4
2020-09-13 21:03:03	Yes	19	2	1	1	1	1	1	2
2020-09-13 21:41:39	Yes	19	1	1	2					6
2020-09-13 22:56:03	Yes	23	1	1	3
2020-09-13 22:57:36	Yes	26	2	1	3
2020-09-13 23:11:41	Yes	18	1	1	1	1, 3	1	2	2
2020-09-13 23:29:56	Yes	28	1	1	2					5
2020-09-14 00:28:35	Yes	24	2	1	1	1	1	1	3
2020-09-14 01:59:37	Yes	22	1	1	3
2020-09-14 06:35:39	Yes	21	1	1	1	1	1	1	3
2020-09-14 06:44:40	Yes	23	2	1	4
2020-09-14 07:16:44	Yes	32	1	1	1	2	1	1	3
2020-09-14 08:30:13	Yes	20	2	1	1	2	1	2	1
2020-09-14 08:30:38	Yes	20	1	1	1	1	1	1	1
2020-09-14 08:37:03	Yes	18	1	1	1	1, 2, 3, 6, 6, 6	1	1	3
2020-09-14 08:38:13	Yes	23	1	1	1	3	1	2	3
2020-09-14 08:46:29	Yes	24	1	1	3
2020-09-14 08:56:10	Yes	34	1	1	2					4
2020-09-14 10:39:37	Yes	20	1	1	1	3	1	1	3
2020-09-14 10:45:06	Yes	20	2	1	1	1, 2	1	2	3
2020-09-14 14:19:05	Yes	19	1	1	1	1	1	1	1
2020-09-14 14:25:02	Yes	33	1	1	1	1	1	1	3
2020-09-14 14:33:10	Yes	36	1	1	2					5
2020-09-14 14:46:13	Yes	22	1	1	3
2020-09-14 14:53:47	Yes	25	1	1	2					6
2020-09-14 15:00:02	Yes	75	1	1	1	2	1	1	1
2020-09-14 15:11:19	Yes	17	1	1	1	1, 2	1	1	1
2020-09-14 15:24:40	Yes	26	1	1	1	1	1	1	3
2020-09-14 15:29:12	Yes	27	1	1	1	1	1	1	3
2020-09-14 15:57:37	Yes	18	1	1	1	1	1	2	3
2020-09-14 16:15:24	Yes	20	2	1	1	1, 2, 6	1	1	3
2020-09-14 16:34:26	Yes	23	1	1	1	2	1	1	3
2020-09-14 16:40:36	Yes	16	2	1	1	1, 2	1	1	3
2020-09-14 16:41:10	Yes	20	1	1	3
2020-09-14 17:32:17	Yes	18	1	1	3
2020-09-14 18:24:25	Yes	22	2	1	3
2020-09-14 18:30:49	Yes	21	1	1	1	1, 3	1	1	1
2020-09-14 18:47:23	Yes	23	1	1	1	2	1	1	1
2020-09-14 19:02:04	Yes	22	1	1	1	3	1	1	1
2020-09-14 20:10:07	Yes	43	1	2	1	1	1	1	2
2020-09-14 20:12:24	Yes	24	2	1	1	1	1	1	2
2020-09-14 20:28:59	Yes	17	2	1	1	1, 2, 5, 4, 4, 5, 6	1	1	3
2020-09-14 20:30:21	Yes	20	1	1	2					6
2020-09-14 20:43:01	Yes	28	1	1	2					4
2020-09-14 21:26:43	Yes	29	1	1	1	1	2	2	1
2020-09-14 22:59:48	Yes	24	1	1	3
2020-09-15 04:51:08	Yes	33	2	1	1	1	1	1	2
2020-09-15 06:14:28	Yes	25	1	1	4
2020-09-15 06:16:14	Yes	20	1	2	1	1	2	2	1
2020-09-15 06:37:07	Yes	20	2	1	1	1	1	1	1
2020-09-15 07:41:55	Yes	27	1	1	3
2020-09-15 07:45:54	Yes	26	1	1	1	1, 2, 3	1	1	3
2020-09-15 08:05:41	Yes	23	2	1	1	1, 2	1	1	3
2020-09-15 08:21:10	Yes	32	1	1	2					6
2020-09-15 08:28:12	Yes	21	2	1	1	1, 2	1	1	3
2020-09-15 09:27:36	Yes	33	1	1	1	1	1	1	3
2020-09-15 09:30:39	Yes	20	1	1	1	1, 2	1	1	1
2020-09-15 10:12:16	Yes	33	1	1	1	1	1	1	3
2020-09-15 10:18:17	Yes	28	2	1	1	1	1	1	1
2020-09-15 10:27:09	Yes	22	1	1	1	1	1	1	1
2020-09-15 10:52:56	Yes	33	1	1	1	1	1	1	3
2020-09-15 11:19:59	Yes	30	1	1	1	2	1	1	2
2020-09-15 11:28:22	Yes	29	2	1	1	1	1	1	3
2020-09-15 11:40:39	Yes	32	1	1	4
2020-09-15 11:50:46	Yes	26	1	1	1	1	2	2	1
2020-09-15 12:15:56	Yes	20	2	1	1	1	1	1	3
2020-09-15 13:16:33	Yes	34	1	1	1	1	1	1	3
2020-09-15 13:27:56	Yes	25	1	1	1	1, 3	2	2	3
2020-09-15 14:14:42	Yes	33	2	1	1	1	1	1	3
2020-09-15 17:08:54	Yes	24	1	1	3
2020-09-15 17:47:47	Yes	32	1	1	1	1	1	1	3
2020-09-15 17:54:32	Yes	63	1	1	1	1	1	1	1
2020-09-15 18:32:49	Yes	18	1	1	1	1, 2	1	1	1
2020-09-15 18:40:23	Yes	19	2	1	1	1	1	1	2
2020-09-15 19:00:16	Yes	43	1	1	3
2020-09-15 19:26:49	Yes	51	1	1	1	3	1	1	1
2020-09-15 19:31:35	Yes	25	1	1	4
2020-09-15 20:00:53	Yes	18	1	1	3
2020-09-15 20:25:31	Yes	32	1	1	1	1	1	1	3
2020-09-15 20:32:31	Yes	33	1	1	1	2	1	1	3
2020-09-15 20:52:21	Yes	29	1	1	2					6
2020-09-15 21:12:35	Yes	35	1	1	1	3	1	1	1
2020-09-15 21:17:38	Yes	17	1	1	2					4
2020-09-15 21:54:15	Yes	16	1	1	3
2020-09-15 22:12:43	Yes	33	1	1	1	1	1	1	3
2020-09-16 04:24:51	Yes	24	1	1	1	2, 3	1	1	3
2020-09-16 08:24:47	Yes	27	1	1	1	1	1	1	2
2020-09-16 09:31:57	Yes	29	1	1	1	1	1	1	2
2020-09-16 09:37:53	Yes	26	2	1	1	1	1	1	3
2020-09-16 10:01:17	Yes	18	2	1	2					5
2020-09-16 10:34:21	Yes	28	1	1	1	3	1	1	3
2020-09-16 10:37:35	Yes	23	1	1	1	1	1	1	3
2020-09-16 11:26:38	Yes	19	1	1	1	1, 2, 4, 6	1	1	3
2020-09-16 12:03:22	Yes	17	1	1	1	3	1	2	1
2020-09-16 12:04:52	Yes	32	1	1	2					6
2020-09-16 12:56:40	Yes	20	2	1	4
2020-09-16 13:11:18	Yes	22	1	1	2					6
2020-09-16 13:20:23	Yes	29	2	1	4
2020-09-16 14:06:04	Yes	24	1	1	2					6
2020-09-16 15:55:45	Yes	34	1	1	3
2020-09-16 16:41:37	Yes	18	2	1	4
2020-09-16 17:34:16	Yes	23	1	2	1	2	2	2	3
2020-09-16 17:38:10	Yes	31	1	1	1	1	1	1	2
2020-09-16 18:05:04	Yes	26	2	1	2					6
2020-09-16 18:14:25	Yes	19	2	1	1	2	1	1	1
2020-09-16 19:10:12	Yes	43	2	1	2					6
2020-09-16 20:22:17	Yes	32	1	1	2					4
2020-09-16 21:41:57	Yes	22	1	1	2					6
2020-09-16 22:42:49	Yes	21	1	1	1	1, 2, 3	1	1	3
2020-09-17 00:03:05	Yes	26	1	1	1	3	1	1	3
2020-09-17 07:52:23	Yes	38	1	1	1	1	1	1	3
2020-09-17 09:28:21	Yes	24	1	1	1	1	1	2	1
2020-09-17 09:59:38	Yes	35	1	1	1	1, 3	1	1	3
2020-09-17 11:04:28	Yes	29	2	1	4
2020-09-17 13:15:27	Yes	24	2	1	1	2	1	1	1
2020-09-17 15:58:05	Yes	25	1	1	1	1	1	1	1
2020-09-17 16:17:01	Yes	22	1	2	1	2	1	2	3
2020-09-17 16:17:21	Yes	30	2	1	4
2020-09-17 16:42:54	Yes	27	2	1	1	1, 2, 3, 4	1	1	1
2020-09-17 17:54:29	Yes	32	1	1	1	2	1	1	1
2020-09-17 19:59:00	Yes	22	1	1	1	1	1	1	3
2020-09-17 20:00:35	Yes	18	2	1	1	1, 3	1	1	3
2020-09-17 21:54:21	Yes	35	1	1	4
2020-09-17 22:29:16	Yes	21	1	2	1	1	2	2	2
2020-09-17 22:38:10	Yes	24	1	1	1	1, 2	1	1	3
2020-09-17 23:11:17	Yes	28	1	1	2					6
2020-09-17 23:15:55	Yes	19	1	1	1	1, 3	1	2	1
2020-09-17 23:53:37	Yes	22	1	1	2					4
2020-09-18 07:03:47	Yes	28	1	1	1	1	1	1	3
2020-09-18 07:25:48	Yes	20	1	1	3
2020-09-18 07:59:47	Yes	22	1	1	2					4
2020-09-18 09:47:38	Yes	23	1	1	1	1	2	2	2
2020-09-18 10:02:25	Yes	30	1	1	1	2	1	1	3
2020-09-18 11:12:59	Yes	40	2	1	3
2020-09-18 12:04:28	Yes	28	2	1	1	1, 2	1	1	3
2020-09-18 12:13:44	Yes	25	1	1	1	1, 2	1	1	3
2020-09-18 12:21:56	Yes	21	1	1	1	1	1	1	3
2020-09-18 12:58:22	Yes	28	1	1	2					4
2020-09-18 13:10:21	Yes	31	2	1	1	3	1	2	3
2020-09-18 13:59:26	Yes	51	1	2	1	1	1	1	2
2020-09-18 14:11:14	Yes	20	1	1	3
2020-09-18 16:02:41	Yes	27	1	2	1	1	1	1	3
2020-09-18 16:05:58	Yes	22	1	2	1	1, 2, 3	1	2	1
2020-09-18 18:24:02	Yes	29	1	1	1	1	1	1	3
2020-09-18 21:25:37	Yes	37	1	1	3
2020-09-19 01:44:02	Yes	35	2	1	1	1	1	1	3
2020-09-19 12:28:15	Yes	23	1	1	1	1	1	1	1
2020-09-19 14:17:33	Yes	23	2	1	1	1, 2, 3, 4	1	1	2
2020-09-19 15:02:46	Yes	14	2	1	1	1, 2	1	1	3
2020-09-19 15:11:58	Yes	22	1	1	2					5
2020-09-19 15:25:02	Yes	18	2	1	1	1	1	1	3
2020-09-19 17:06:42	Yes	21	2	1	1	4	1	1	3
2020-09-19 17:44:32	Yes	66	1	1	2					6
2020-09-19 18:04:28	Yes	33	1	1	1	2	1	1	3
2020-09-19 20:21:07	Yes	23	2	2	1	1, 2, 4, 6, 6	1	1	1
2020-09-19 20:58:02	Yes	23	2	1	1	1, 2	1	1	3
2020-09-19 21:27:24	Yes	38	2	1	3
2020-09-19 21:30:36	Yes	22	2	1	4
2020-09-19 21:32:52	Yes	18	1	1	1	1, 2	1	2	1
2020-09-19 21:43:01	Yes	25	1	1	3
2020-09-19 23:48:34	Yes	28	1	1	4
2020-09-20 04:46:36	Yes	41	1	1	4
2020-09-20 07:49:48	Yes	58	2	1	2					6
2020-09-20 10:23:05	Yes	37	2	1	1	2	1	1	1
2020-09-20 10:49:07	Yes	26	1	1	2					4
2020-09-20 11:48:15	Yes	32	1	1	1	1	1	1	2
2020-09-20 12:02:56	Yes	20	1	1	4
2020-09-20 12:23:54	Yes	28	2	1	1	1, 2	1	1	3
2020-09-20 12:31:38	Yes	18	2	1	1	1	1	2	3
2020-09-20 12:43:09	Yes	22	2	1	1	1	1	1	3
2020-09-20 13:13:14	Yes	17	2	1	1	1, 2, 4	1	1	3
2020-09-20 13:55:55	Yes	40	1	1	2					4
2020-09-20 13:58:19	Yes	23	1	1	3
2020-09-20 14:05:50	Yes	51	1	1	3
2020-09-20 14:16:39	Yes	25	1	1	3
2020-09-20 14:32:07	Yes	28	2	1	1	1	1	1	2
2020-09-20 14:35:05	Yes	25	1	1	2					6
2020-09-20 14:37:27	Yes	57	1	1	1	1	1	2	1
2020-09-20 14:42:46	Yes	34	2	1	3
2020-09-20 15:12:16	Yes	32	2	1	2					6
2020-09-20 15:14:45	Yes	32	1	1	2					6
2020-09-20 15:16:29	Yes	34	1	1	1	1	2	2	2
2020-09-20 15:31:16	Yes	38	1	1	2					6
2020-09-20 15:43:57	Yes	21	2	1	1	1	1	1	3
2020-09-20 16:23:11	Yes	31	1	1	2					6
2020-09-20 16:44:16	Yes	17	2	1	1	1	1	1	3
2020-09-20 17:00:10	Yes	30	2	2	1	1, 3	1	1	1
2020-09-20 17:11:40	Yes	21	1	1	3
2020-09-20 17:44:24	Yes	21	2	1	1	3, 5	1	2	3
2020-09-20 18:22:46	Yes	19	2	1	1	1, 2, 4	1	1	3
2020-09-20 18:47:23	Yes	22	1	1	2					6
2020-09-20 19:02:48	Yes	44	1	1	2					4
2020-09-20 19:23:53	Yes	24	2	1	1	2	1	1	3
2020-09-20 19:34:01	Yes	45	2	1	1	2	1	1	3
2020-09-20 19:51:57	Yes	43	1	1	1	1, 3	1	1	3
2020-09-20 20:27:38	Yes	41	1	1	1	2	1	1	3
2020-09-20 20:29:41	Yes	30	1	1	1	2	1	1	2
2020-09-20 20:38:33	Yes	36	2	1	2					6
2020-09-20 21:03:26	Yes	33	1	1	2					6
2020-09-20 21:23:40	Yes	29	1	1	3
2020-09-20 21:44:48	Yes	26	1	1	2					6
2020-09-20 23:48:30	Yes	26	2	1	1	1, 2	1	1	1
2020-09-20 23:53:36	Yes	23	1	1	1	1, 2	2	2	3
2020-09-21 02:10:23	Yes	29	1	1	4
2020-09-21 03:32:37	Yes	48	1	1	3
2020-09-21 08:03:48	Yes	56	2	1	1	1	1	1	1
2020-09-21 08:07:25	Yes	59	1	1	3
2020-09-21 08:14:06	Yes	59	1	1	1	1	1	1	1
2020-09-21 08:36:13	Yes	35	1	2	1	1, 3	1	1	3
2020-09-21 10:04:04	Yes	30	2	1	2					6
2020-09-21 10:08:56	Yes	20	2	1	2					6
2020-09-21 10:17:58	Yes	49	1	2	3
2020-09-21 10:19:50	Yes	29	1	2	1	1	1	2	1
2020-09-21 10:23:17	Yes	50	1	1	3
2020-09-21 10:54:40	Yes	25	2	1	1	1	1	1	1
2020-09-21 10:57:04	Yes	25	1	1	3
2020-09-21 11:33:11	Yes	24	2	1	4
2020-09-21 12:13:23	Yes	36	2	1	3
2020-09-21 12:19:14	Yes	19	1	1	1	1	1	1	1
2020-09-21 12:41:14	Yes	34	1	1	1	1, 2	1	1	3
2020-09-21 12:47:12	Yes	27	1	1	3
2020-09-21 13:38:13	Yes	32	2	1	1	1	1	2	3
2020-09-21 15:14:45	Yes	28	1	1	2					6
2020-09-21 15:32:05	Yes	31	1	1	2					6
2020-09-21 15:47:25	Yes	25	1	1	4
2020-09-21 17:12:27	Yes	22	1	1	2					6
2020-09-21 17:15:59	Yes	21	1	1	1	1, 2	1	1	3
2020-09-21 17:32:59	Yes	32	1	1	1	1	1	1	1
2020-09-21 17:56:12	Yes	18	1	1	1	1	2	2	1
2020-09-21 18:04:00	Yes	24	1	1	1	1	1	2	1
2020-09-21 18:19:23	Yes	21	1	1	3
2020-09-21 18:43:56	Yes	32	1	1	2					4
2020-09-21 19:39:01	Yes	18	2	1	1	1, 3	1	1	3
2020-09-21 19:49:12	Yes	60	1	1	1	1	1	1	3
2020-09-21 20:08:11	Yes	20	1	1	1	2	1	1	1
2020-09-21 21:44:40	Yes	52	2	1	2					6
2020-09-21 21:49:52	Yes	29	1	1	1	1	1	1	1
2020-09-21 22:51:47	Yes	21	2	1	2					4
2020-09-21 22:57:37	Yes	24	1	1	2					6
2020-09-21 23:05:10	Yes	22	2	1	1	2, 5	1	1	3
2020-09-21 23:55:09	Yes	65	2	1	2					6
2020-09-22 11:33:28	Yes	24	2	1	1	3	1	1	3
2020-09-22 11:34:47	Yes	26	1	1	1	1, 2	1	1	3
2020-09-22 12:04:53	Yes	62	1	1	3
2020-09-22 14:18:41	Yes	18	1	1	2					6
2020-09-22 15:00:22	Yes	43	1	1	1	2	1	1	1
2020-09-22 15:05:55	Yes	27	1	1	3
2020-09-22 17:12:03	Yes	24	1	1	3
2020-09-22 20:41:04	Yes	25	1	1	3
2020-09-22 20:58:32	Yes	26	1	1	3
2020-09-22 21:21:02	Yes	23	1	1	3
2020-09-22 23:50:35	Yes	28	2	1	1	1	1	1	3
2020-09-23 01:28:15	Yes	21	1	1	4
2020-09-23 06:44:21	Yes	25	1	1	2					4
2020-09-23 06:44:46	Yes	25	1	1	2					4
2020-09-23 13:38:09	Yes	24	2	2	2					4
2020-09-23 16:07:02	Yes	22	2	1	1	2	1	1	3
2020-09-23 17:55:30	Yes	18	1	1	1	2	1	1	3
2020-09-23 18:43:44	Yes	27	2	1	1	1, 2	1	1	3
2020-09-23 19:00:00	Yes	33	1	1	3
2020-09-23 19:42:19	Yes	22	1	1	1	1	1	1	3
2020-09-24 00:26:46	Yes	20	1	1	1	1	2	2	2
2020-09-24 04:30:07	Yes	19	2	1	1	1, 4	1	1	3
2020-09-24 08:06:42	Yes	29	2	1	1	3	1	1	3
2020-09-24 08:27:21	Yes	19	2	1	1	2	1	1	1
2020-09-24 10:44:48	Yes	32	1	1	2					4
2020-09-24 10:56:18	Yes	26	2	1	1	1	1	1	3
2020-09-24 14:04:06	Yes	24	1	1	2					4
2020-09-24 17:09:32	Yes	27	2	1	1	1, 2	1	2	3
2020-09-24 19:43:15	Yes	28	2	1	1	1	1	1	1
2020-09-24 22:32:19	Yes	38	1	1	1	1	1	1	3
2020-09-25 08:29:54	Yes	41	2	1	1	2	1	1	1
2020-09-25 12:16:50	Yes	20	2	1	1	1	1	1	3
2020-09-25 13:32:37	Yes	29	1	2	1	1	1	1	3
2020-09-25 14:05:35	Yes	23	2	1	1	4	1	1	3
2020-09-25 17:02:23	Yes	26	1	1	1	1	1	1	1
2020-09-25 17:21:58	Yes	21	1	1	3
2020-09-25 22:14:04	Yes	20	1	1	1	1	1	1	1
2020-09-26 02:07:14	Yes	28	1	1	3
2020-09-26 13:51:13	Yes	26	2	1	3
2020-09-26 17:18:11	Yes	52	2	1	4
2020-09-26 17:34:37	Yes	25	2	1	3
2020-09-26 18:47:19	Yes	46	2	1	2					6
2020-09-26 21:47:07	Yes	39	1	1	1	1	1	1	3
2020-09-26 21:54:14	Yes	25	2	1	2					4
2020-09-27 10:09:22	Yes	40	2	1	1	1	1	1	2
2020-09-27 11:21:17	Yes	36	2	1	2					5
2020-09-27 12:38:15	Yes	40	1	1	1	2	1	1	3
2020-09-27 16:12:49	Yes	21	1	1	1	2	1	1	3
2020-09-27 17:10:54	Yes	39	1	1	1	1	1	1	2
2020-09-27 20:22:56	Yes	18	2	1	1	1, 2, 3, 5, 4	1	2	1
2020-09-27 22:35:49	Yes	18	2	1	1	1	1	1	3
2020-09-27 23:11:27	Yes	17	2	1	1	1, 2	1	1	1
2020-09-28 00:06:38	Yes	17	2	1	1	1	1	2	3
2020-09-28 13:30:57	Yes	21	2	1	1	1, 2	1	2	3
2020-09-28 17:34:46	Yes	36	2	1	1	3	1	1	1
2020-09-28 18:32:56	Yes	20	2	1	1	2	1	1	1
2020-09-28 20:01:41	Yes	33	2	1	1	1, 3	1	1	3
2020-09-29 05:35:53	Yes	28	1	1	1	2	1	1	2
2020-09-29 10:08:48	Yes	30	1	1	2					4
2020-09-29 10:13:36	Yes	33	2	1	1	1	1	1	2
2020-09-29 10:48:59	Yes	45	1	1	1	1, 2	1	1	1
2020-09-29 11:28:47	Yes	30	2	2	2					4
2020-09-29 11:38:14	Yes	27	2	1	1	1	1	1	2
2020-09-29 12:10:45	Yes	25	2	1	1	1, 5	1	2	3
2020-09-29 12:28:53	Yes	36	1	1	1	1, 2	1	1	3
2020-09-29 16:25:05	Yes	31	1	1	2					5
2020-09-29 16:47:31	Yes	33	2	1	1	1, 3	1	1	3
2020-09-29 16:57:33	Yes	19	2	1	4
2020-09-29 17:42:47	Yes	27	2	1	4
2020-09-29 17:49:54	Yes	15	1	1	1	1	1	1	1
2020-09-29 20:40:58	Yes	26	2	1	3
2020-09-29 21:20:01	Yes	27	2	1	1	1, 4	1	2	2
2020-09-29 21:40:49	Yes	54	1	1	3
2020-09-29 22:07:10	Yes	30	1	1	1	1, 3, 6	1	1	3
2020-09-29 22:14:08	Yes	34	2	1	3
2020-09-29 23:36:35	Yes	26	2	1	2					4
2020-09-29 23:58:26	Yes	19	2	1	1	1, 2, 6, 6	1	2	1
2020-09-30 01:21:25	Yes	25	2	1	1	1, 3	1	1	3
2020-09-30 03:06:44	Yes	25	2	1	2					6
2020-09-30 03:14:02	Yes	32	1	1	2					4
2020-09-30 03:21:30	Yes	31	2	1	1	1	1	1	3
2020-09-30 07:22:17	Yes	19	2	1	1	1	1	1	3
2020-09-30 07:23:03	Yes	22	1	1	1	1	1	1	3
2020-09-30 09:27:10	Yes	50	1	1	2					5
2020-09-30 09:37:43	Yes	26	1	1	1	3	1	1	3
2020-09-30 11:22:34	Yes	18	1	1	1	1, 5	1	1	3
2020-09-30 12:33:06	Yes	20	2	1	1	3	1	1	3
2020-09-30 15:30:46	Yes	44	2	1	3
2020-09-30 17:09:11	Yes	39	1	1	3
2020-09-30 18:15:18	Yes	20	1	1	4
2020-09-30 18:26:01	Yes	26	2	1	1	3	1	1	3
2020-09-30 18:29:39	Yes	20	1	1	1	1, 2	1	1	3
2020-09-30 20:08:48	Yes	17	2	1	3
2020-09-30 21:39:26	Yes	28	1	1	1	2	1	1	2
2020-09-30 22:35:39	Yes	31	1	1	1	3	1	1	3
2020-09-30 22:43:18	Yes	22	1	1	1	1, 3	1	2	3
